# Supplementary material for: A novel calix[4]arene-based bifunctional squaramide organocatalyst for enantioselective Michael addition of acetylacetone to nitroolefins
Source: Royal Society of Chemistry journal article supplement (doi:10.1039/c6qo00135a), 2016-01-01

Supporting Information for:

**A novel calix[4]arene-based bifunctional squaramide organocatalyst for  
enantioselective Michael addition of acetyl acetone to nitroolefins**

**Ummu Vural, Mustafa Durmaz\* and Abdulkadir Sirit**

Department of Chemistry, Ahmet Kelesoglu Education Faculty, Necmettin Erbakan University, 42090  
Konya, Turkey.

mdurmaz@konya.edu.tr

**Table of Contents**

|                                                                                 |     |
|---------------------------------------------------------------------------------|-----|
| 1. Copies of $^1\text{H}$ and $^{13}\text{C}$ NMR spectra of all compounds..... | S2  |
| 2. CSP-HPLC Analysis of Addition Products <b>9a–9l</b> .....                    | S18 |

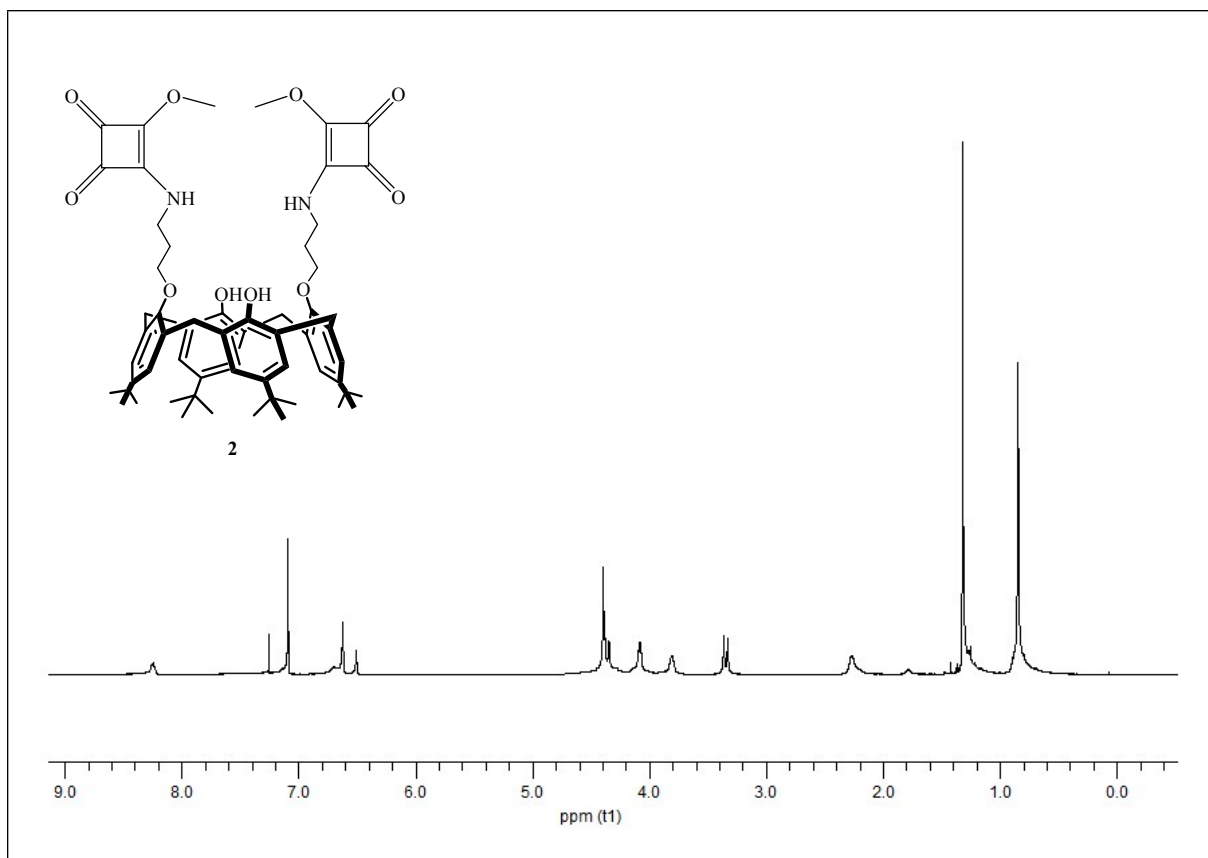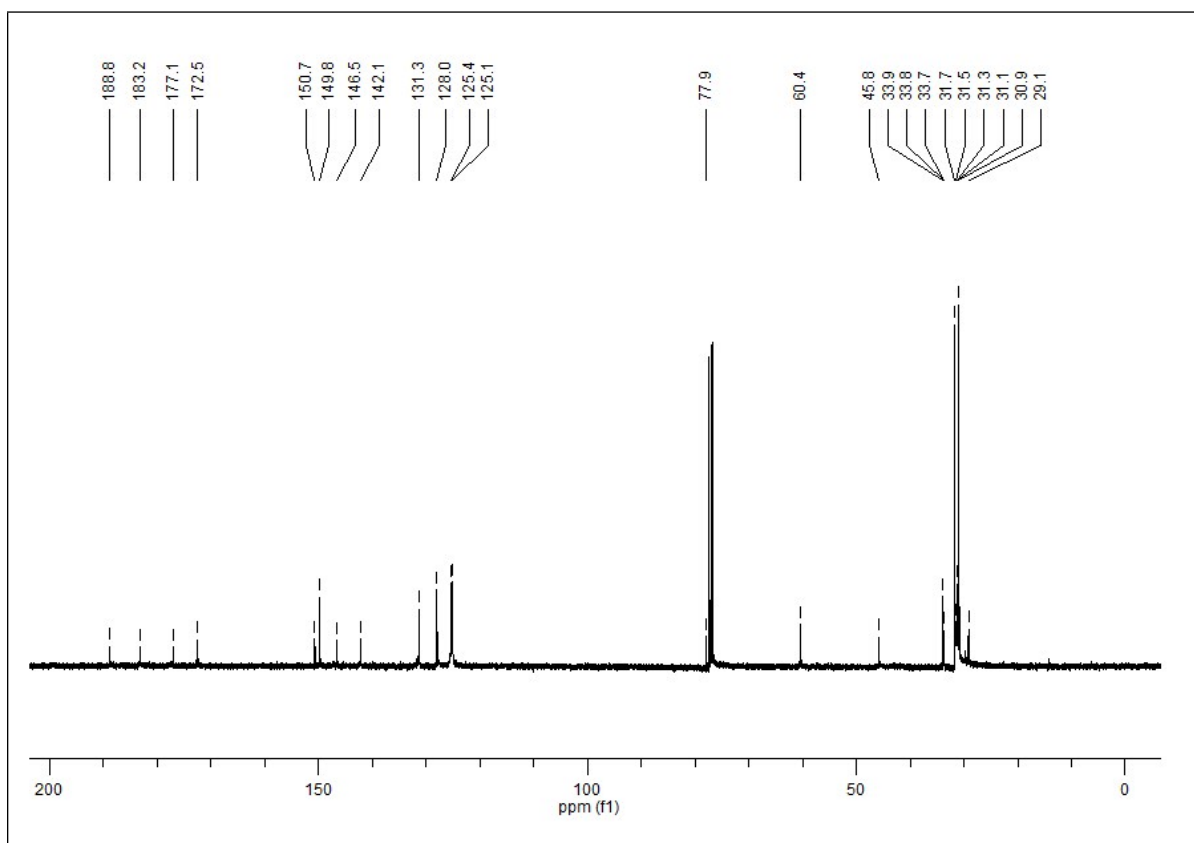

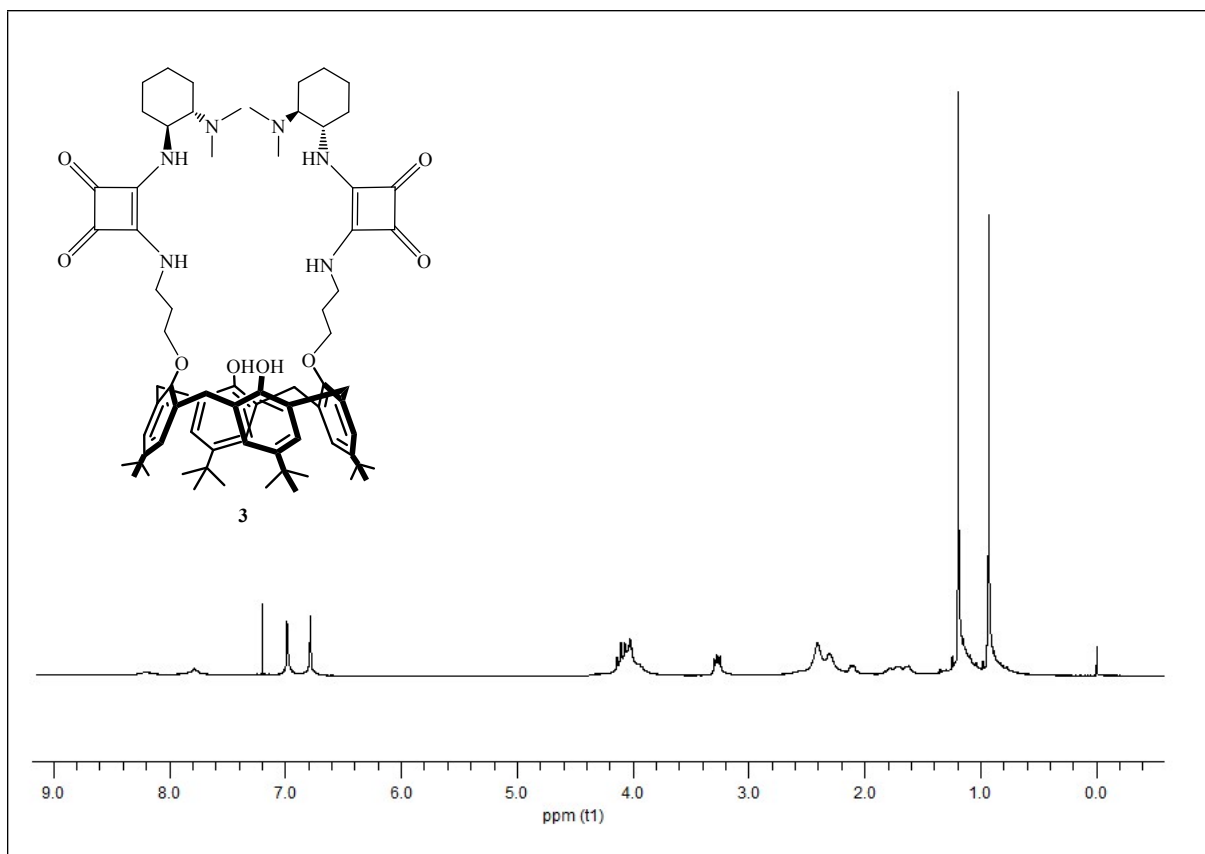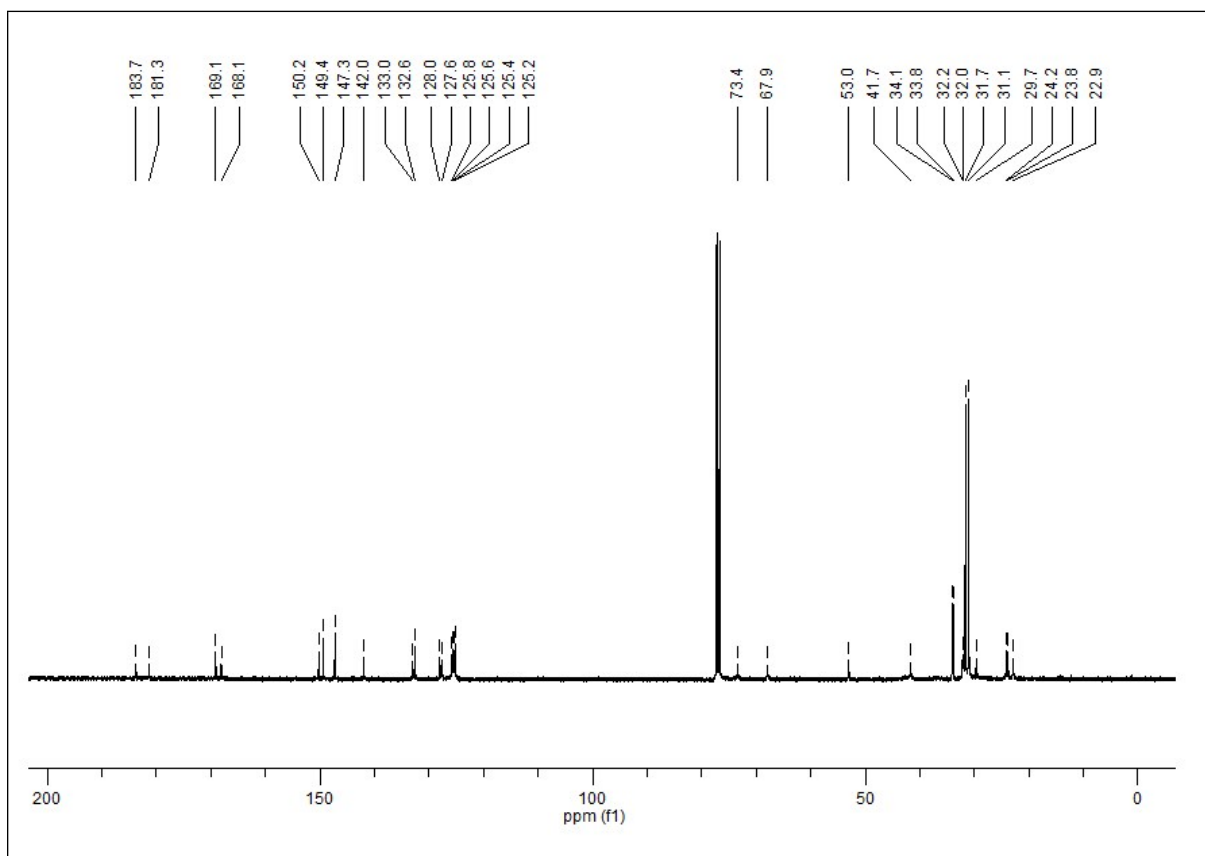

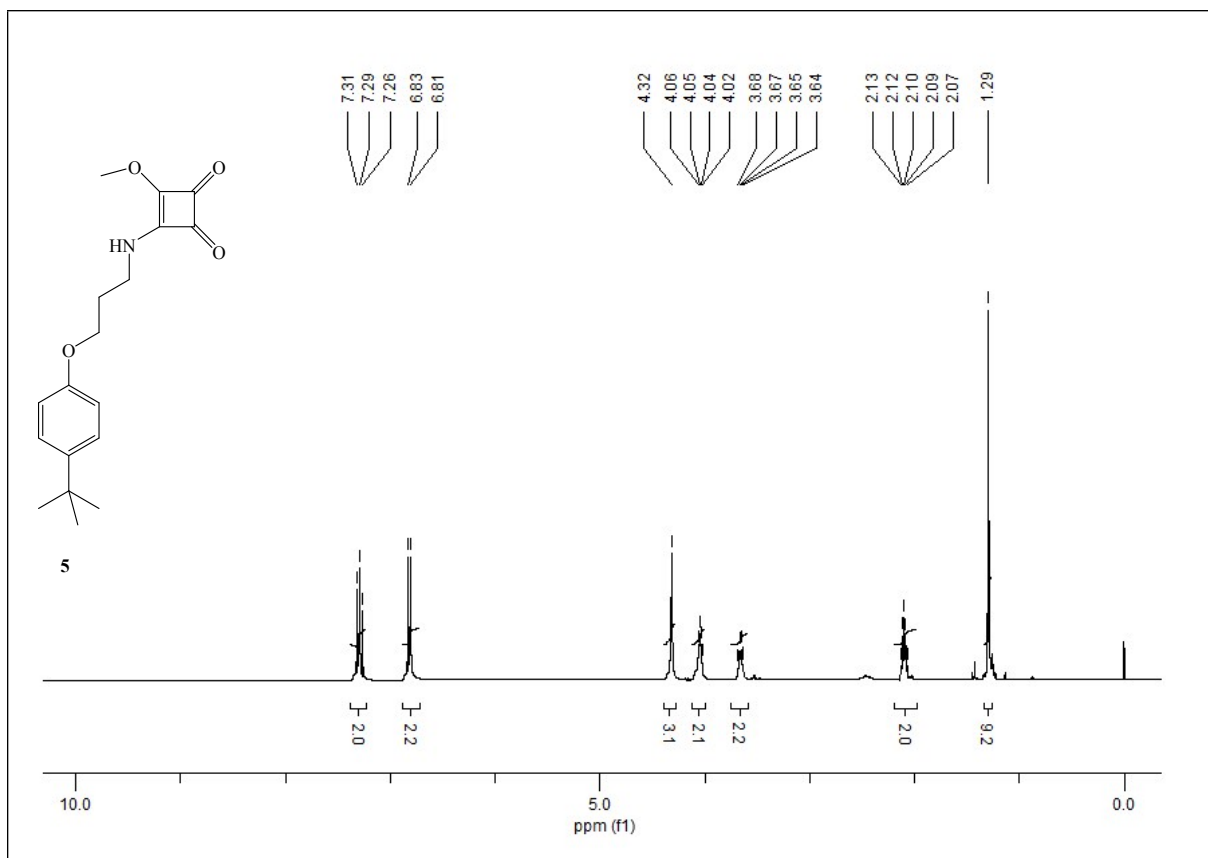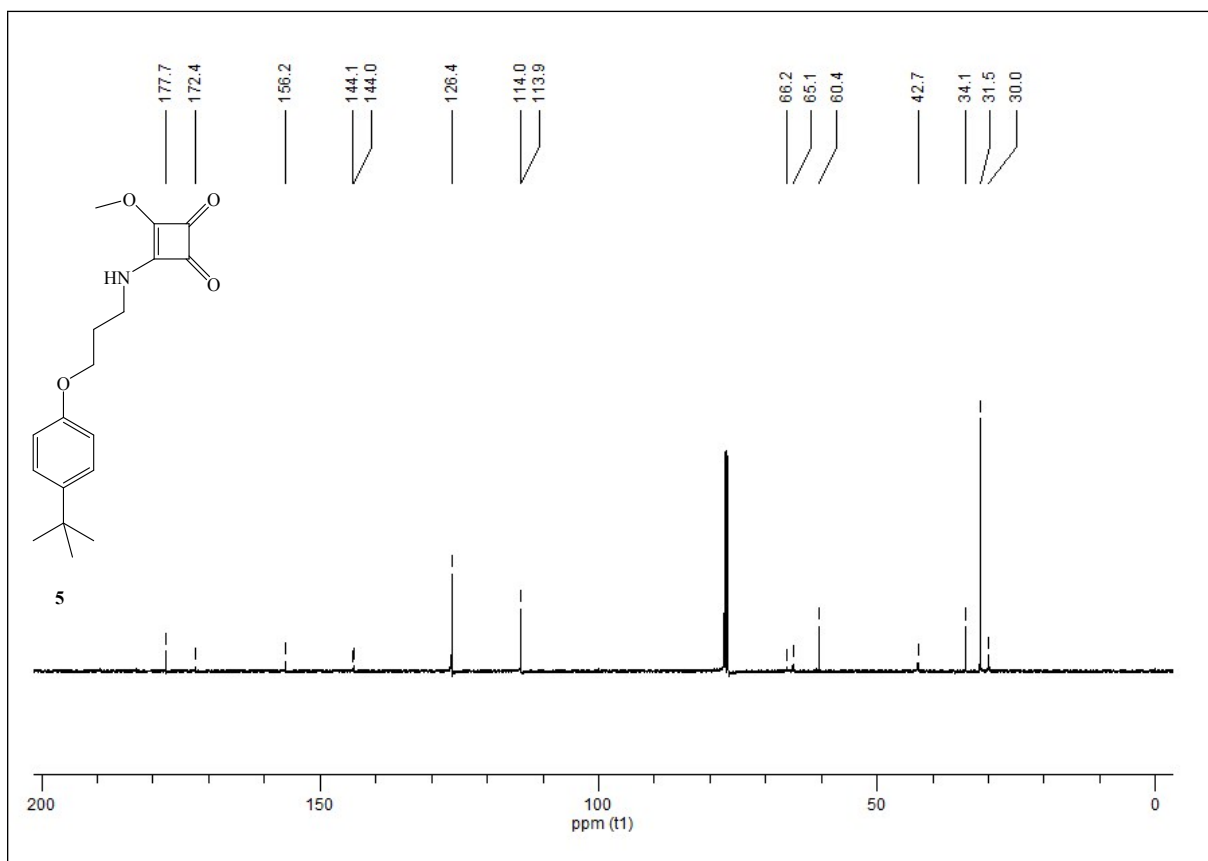

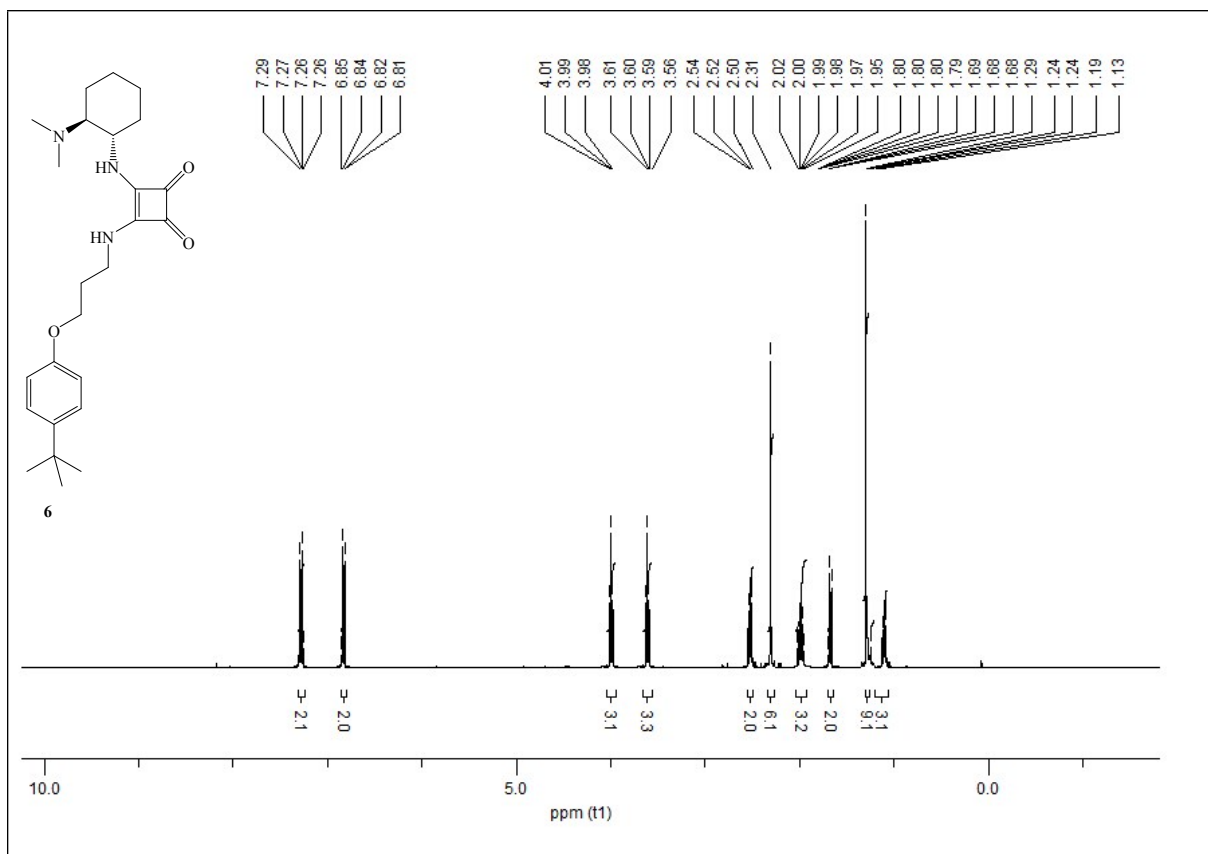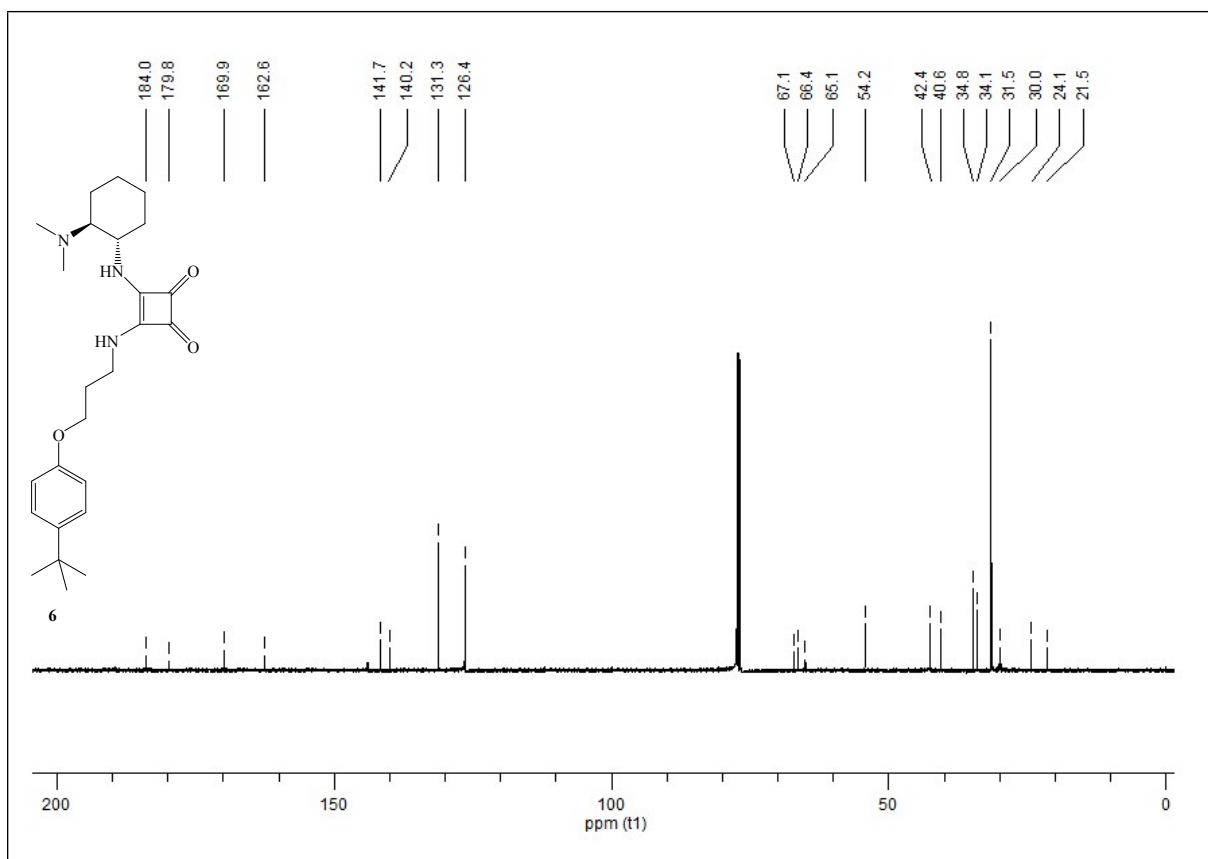

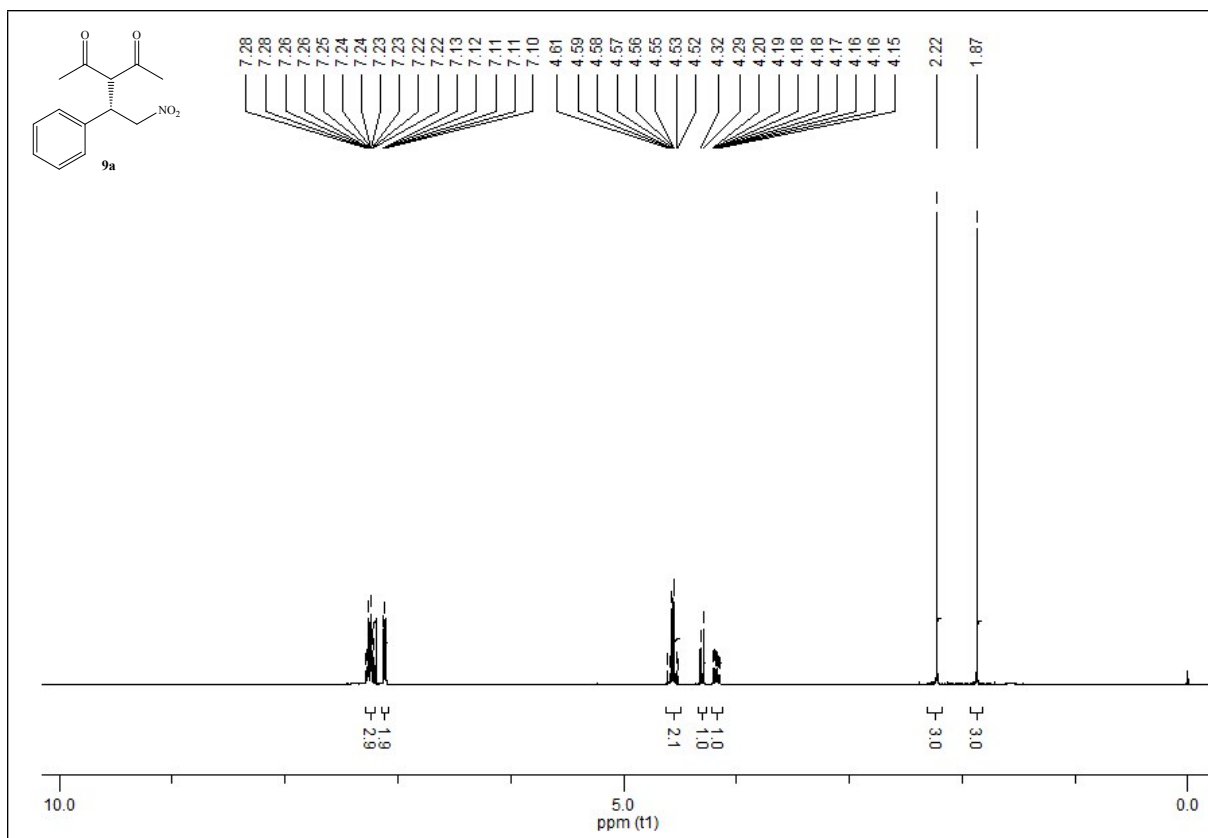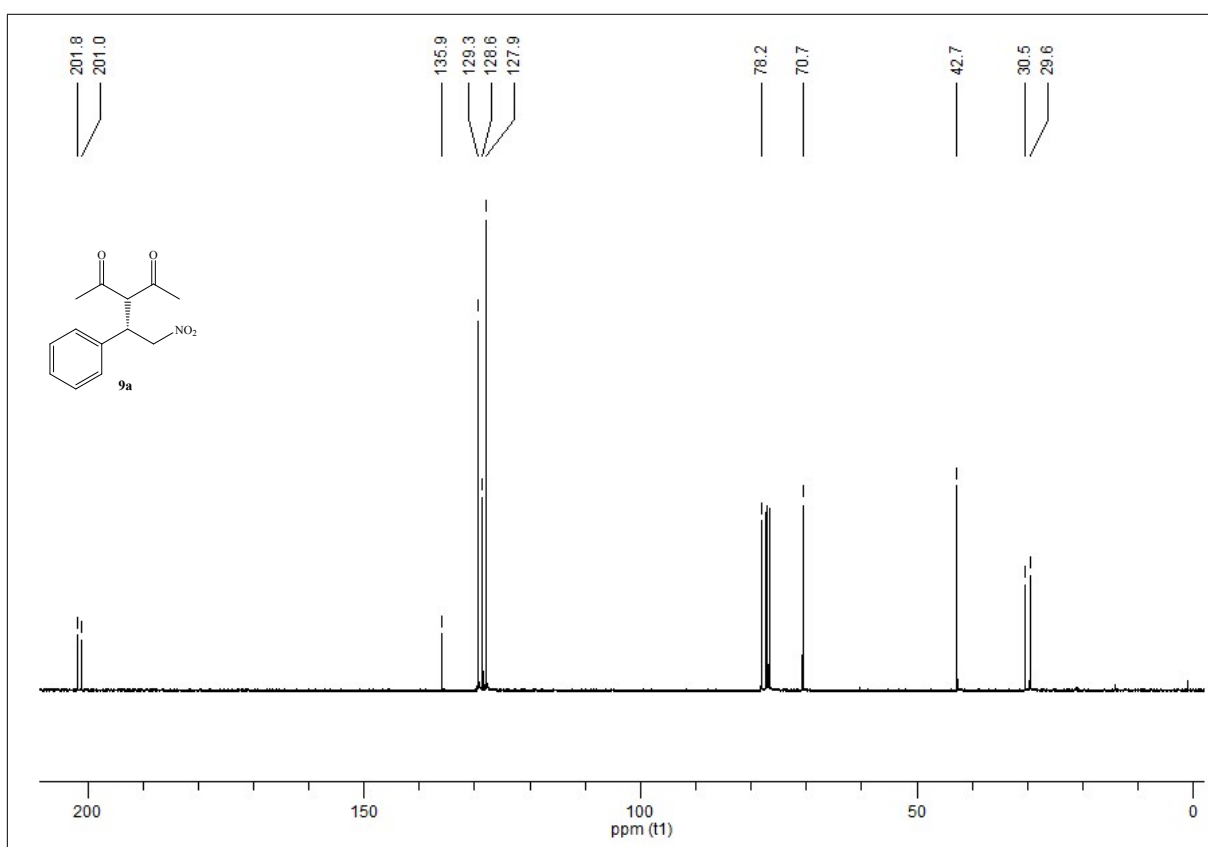

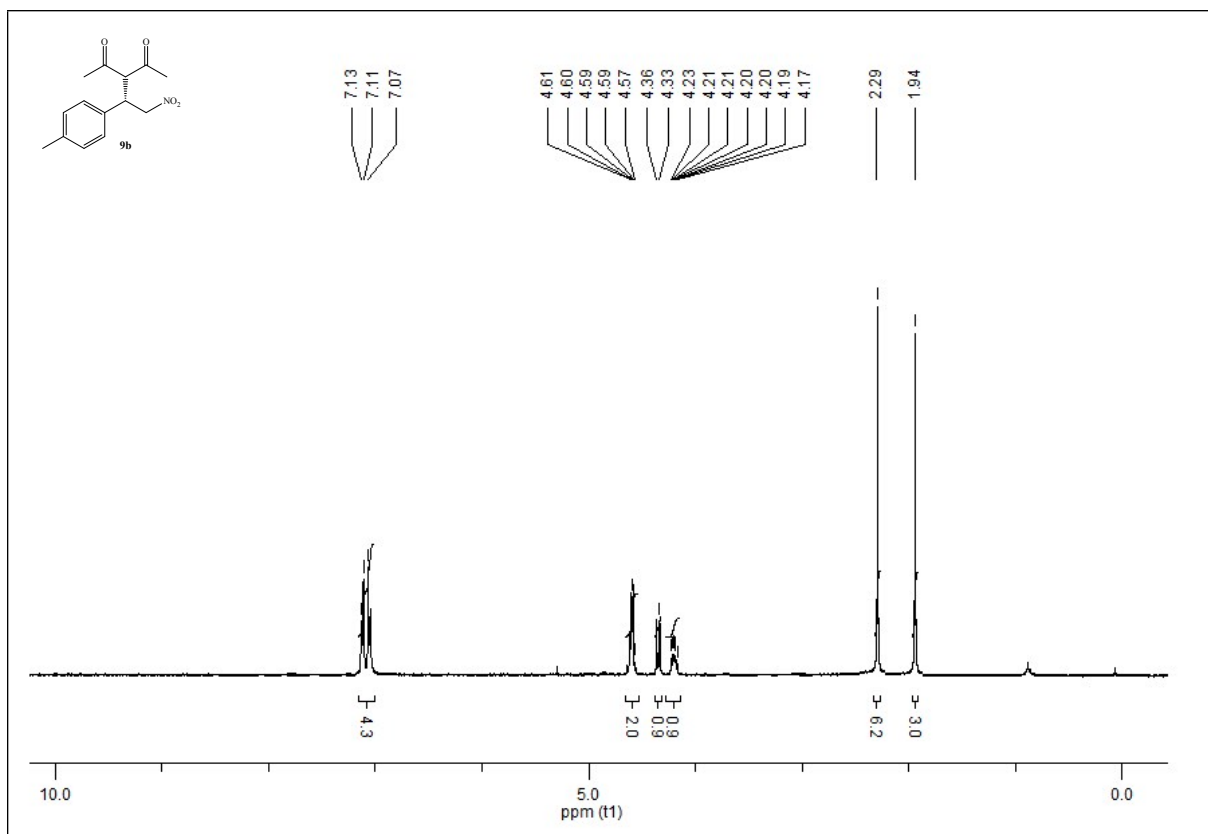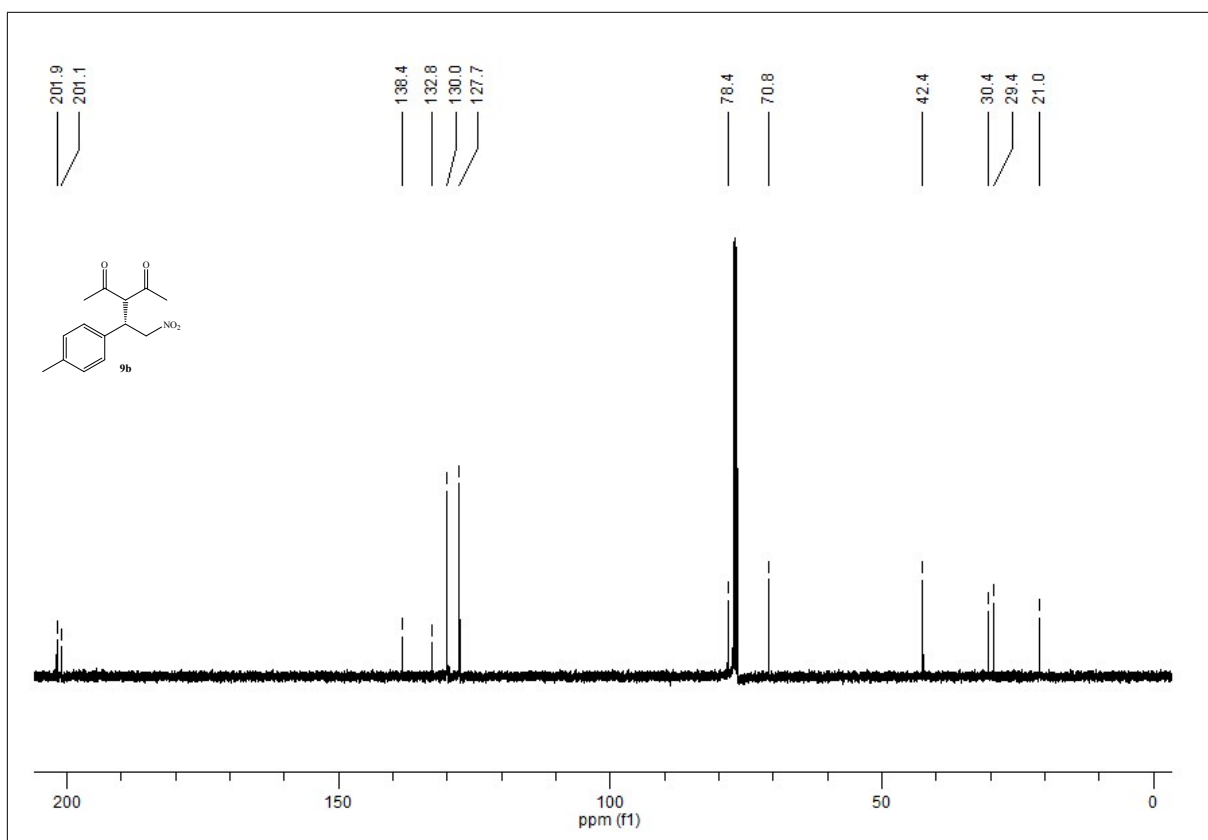

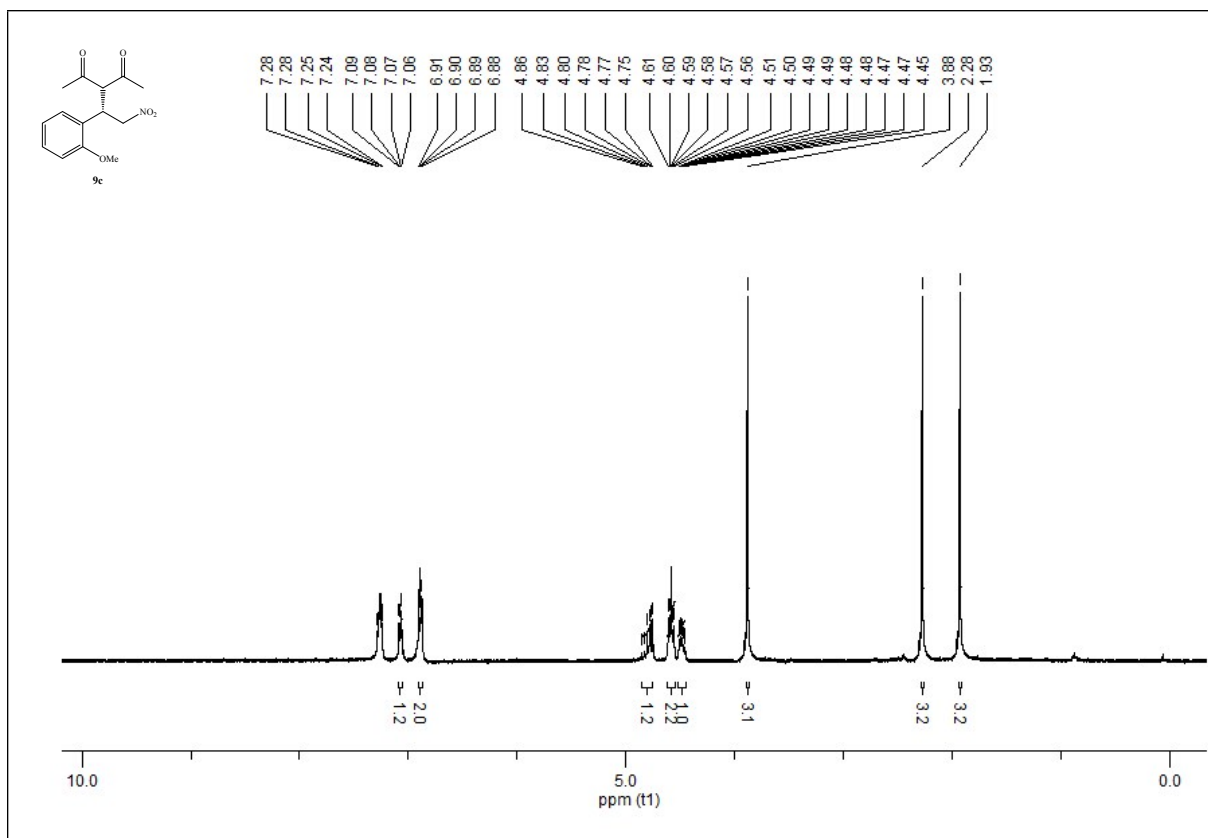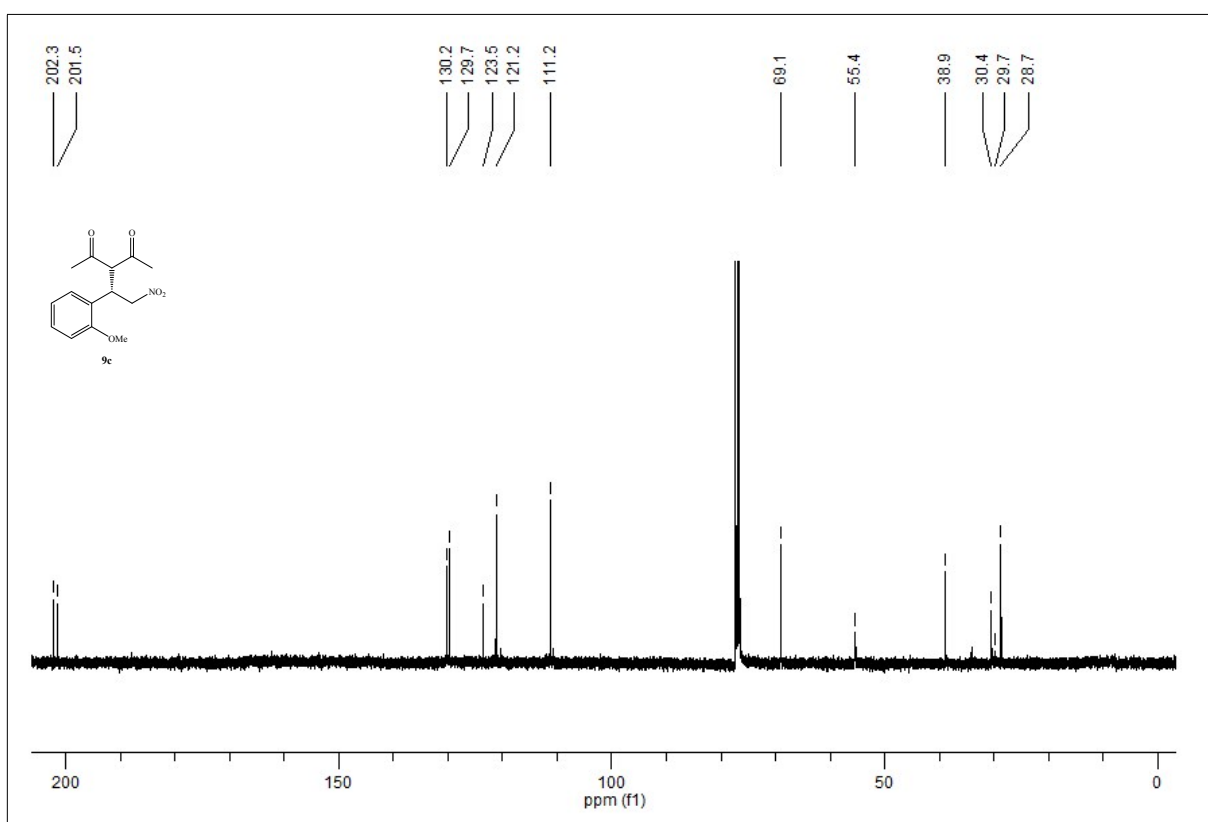



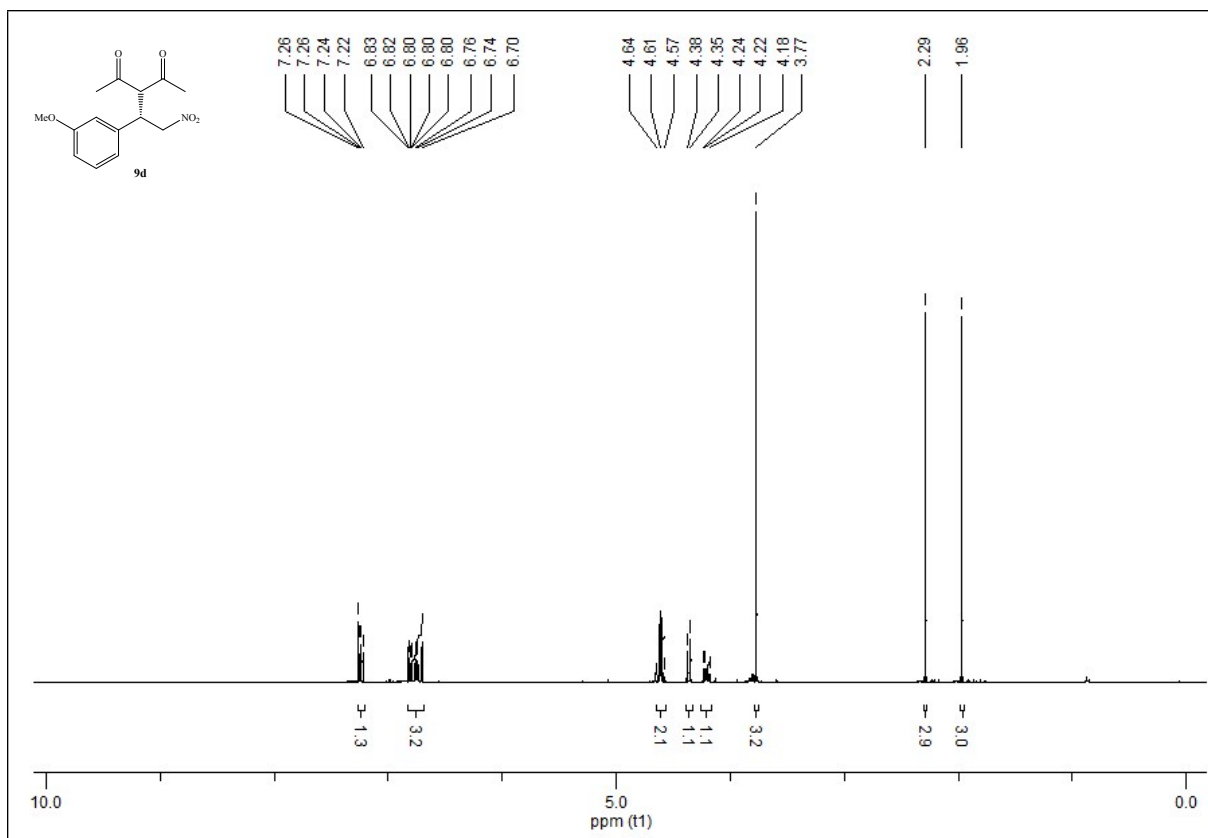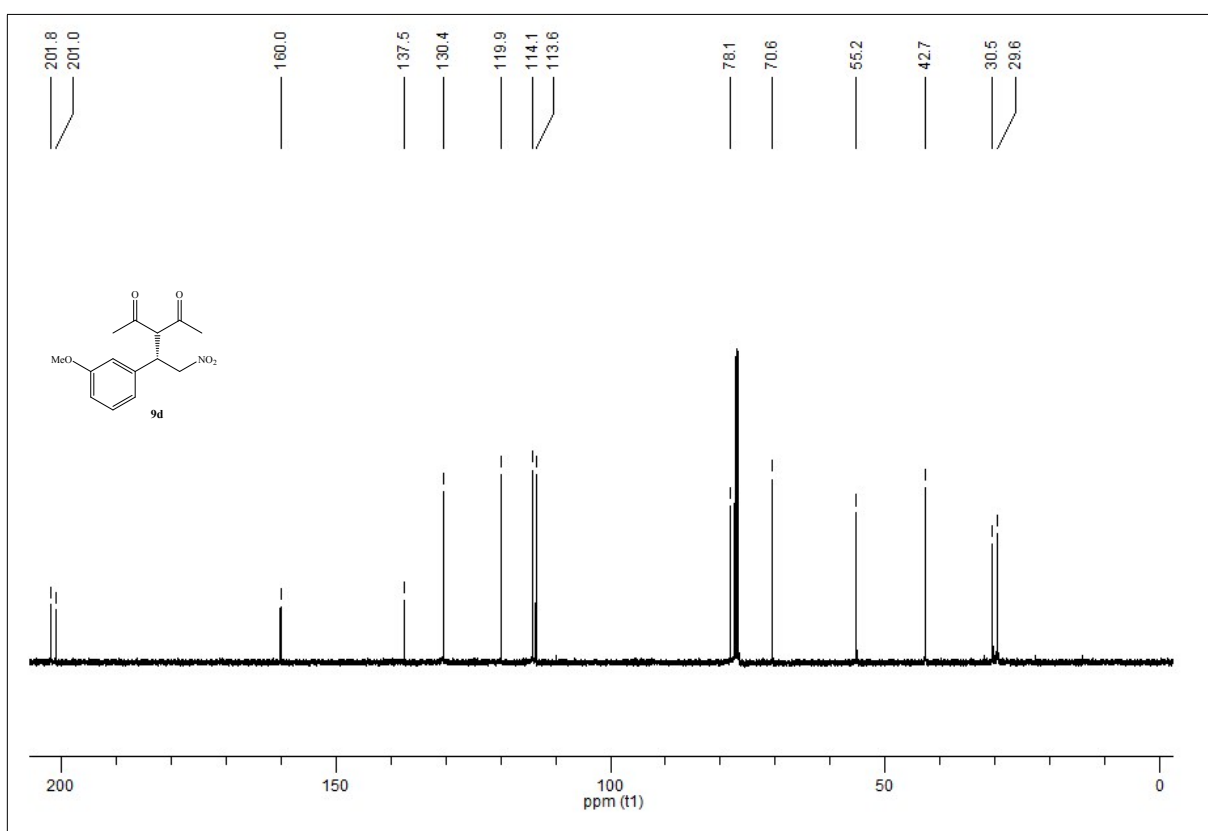

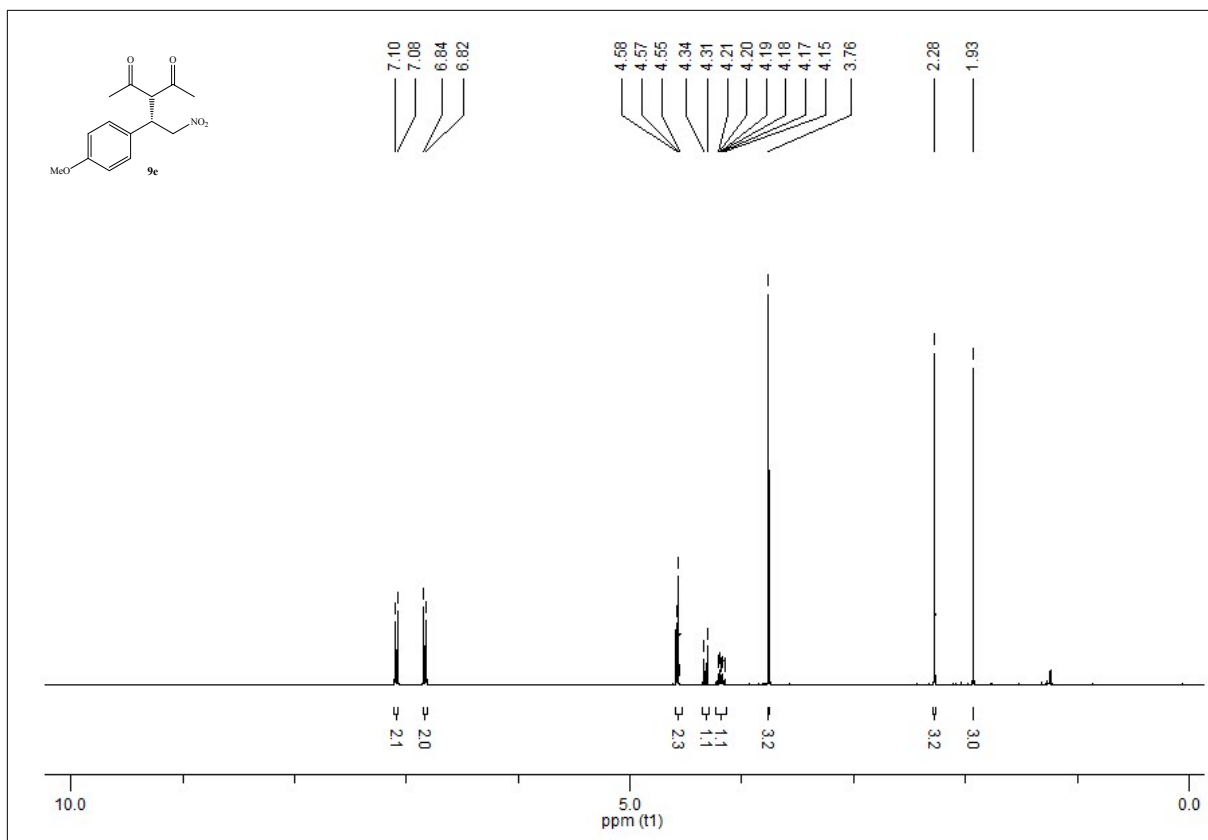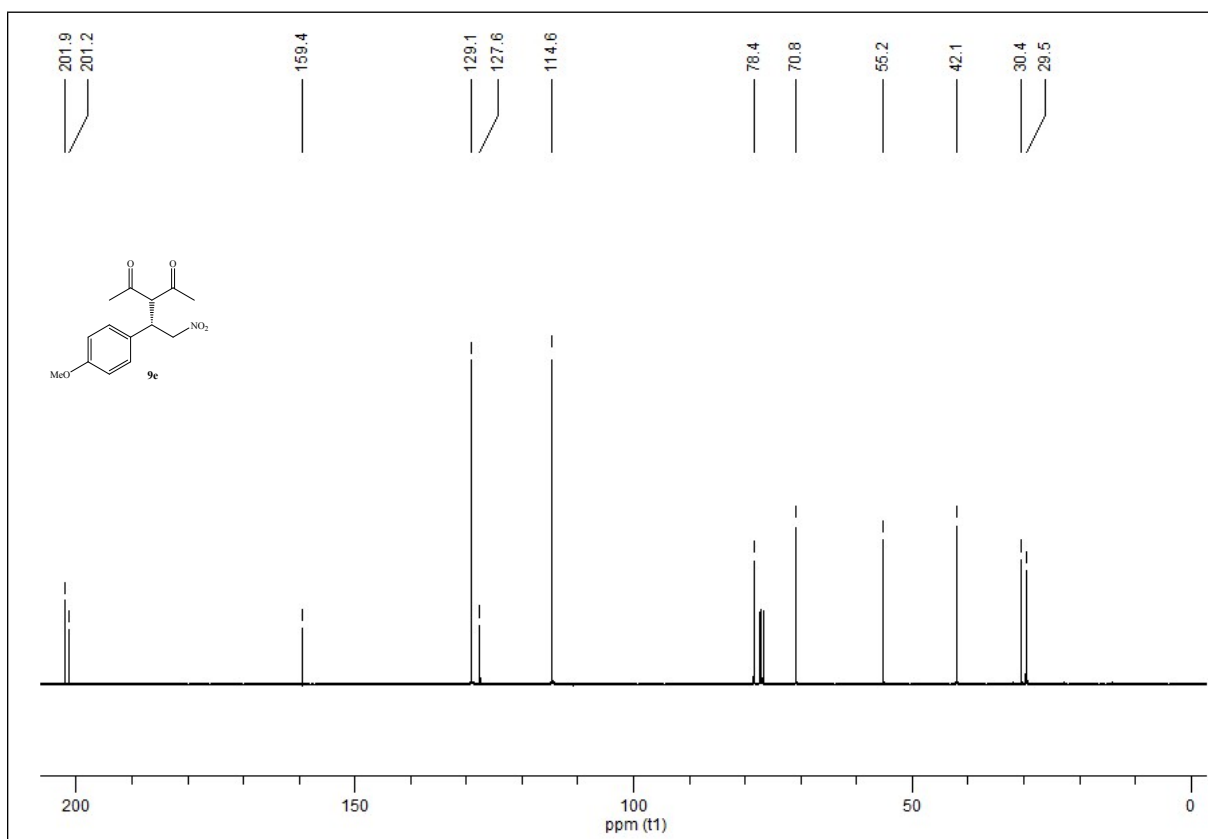

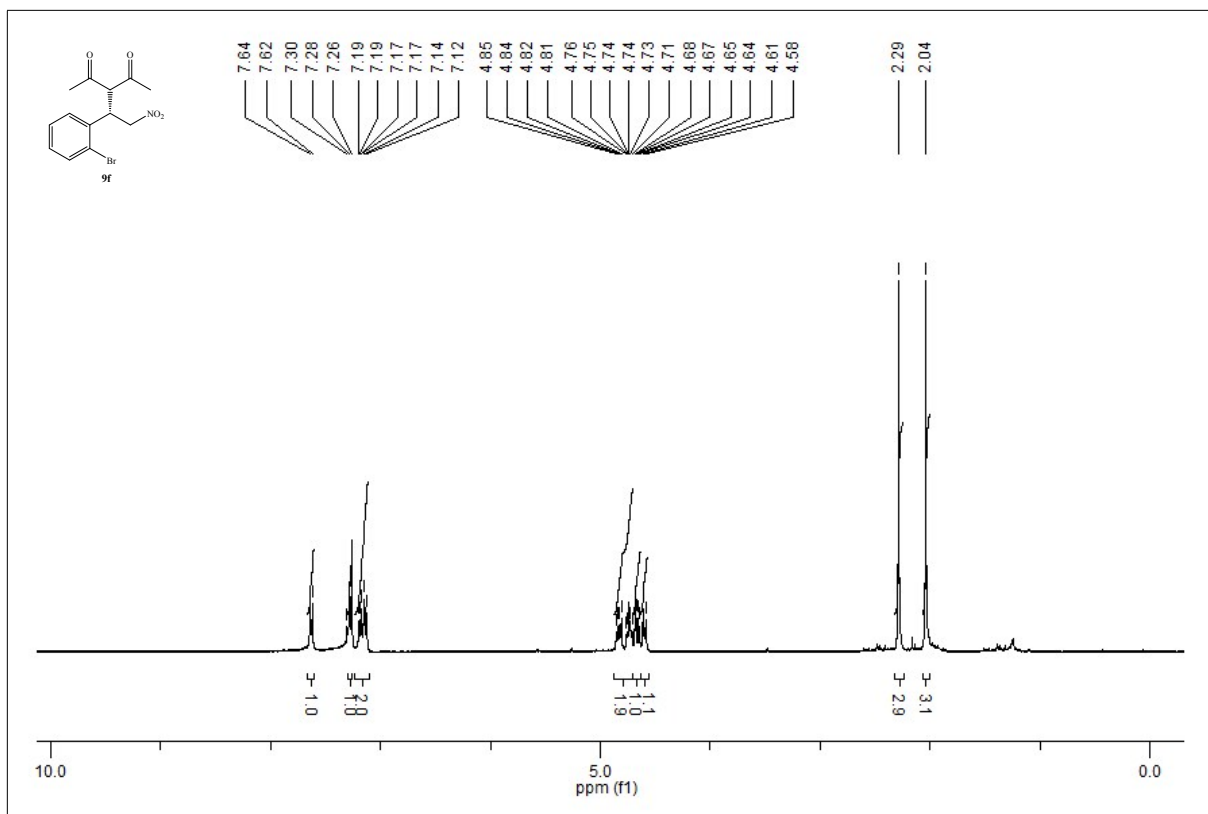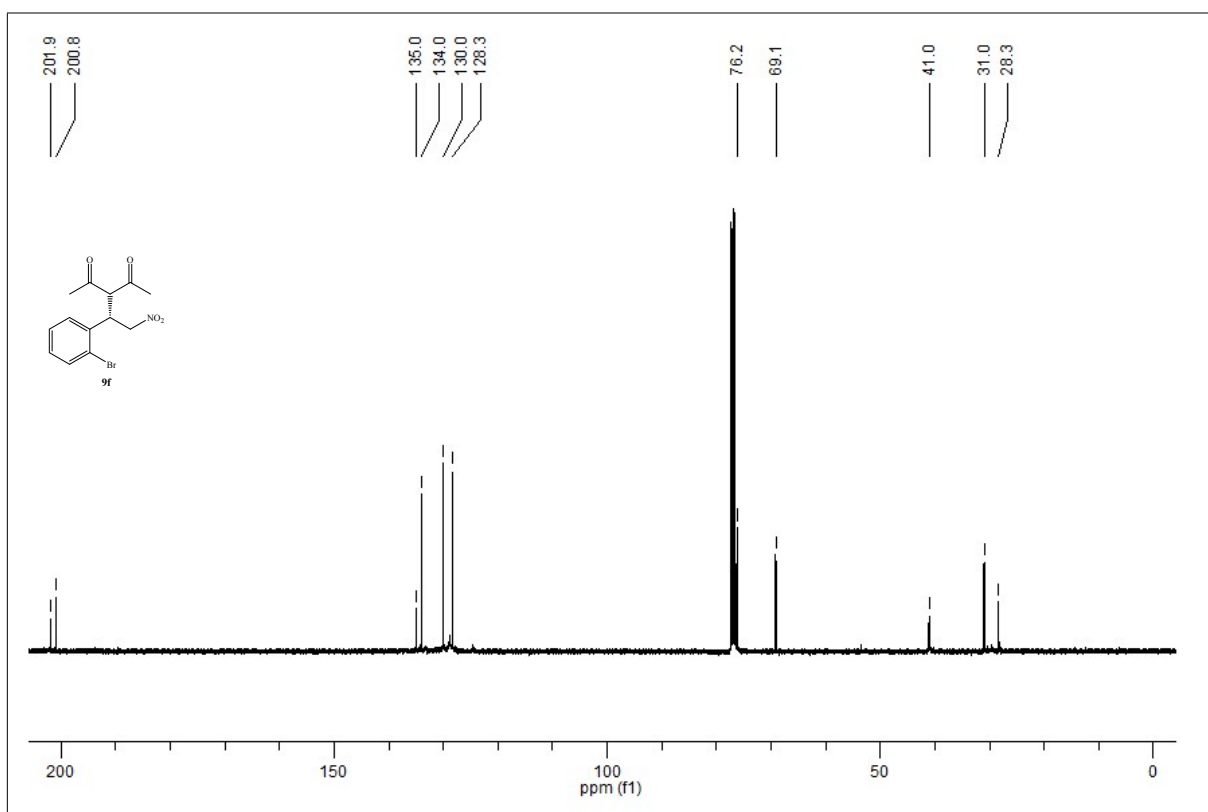

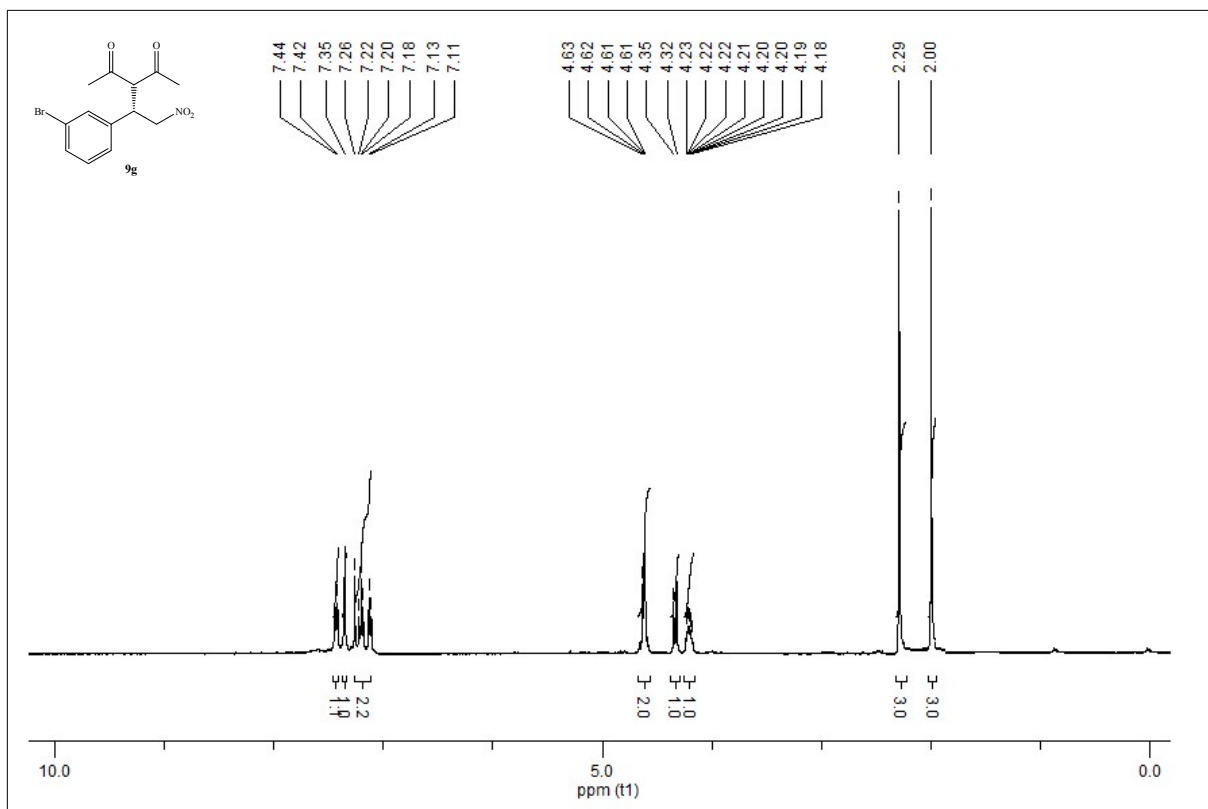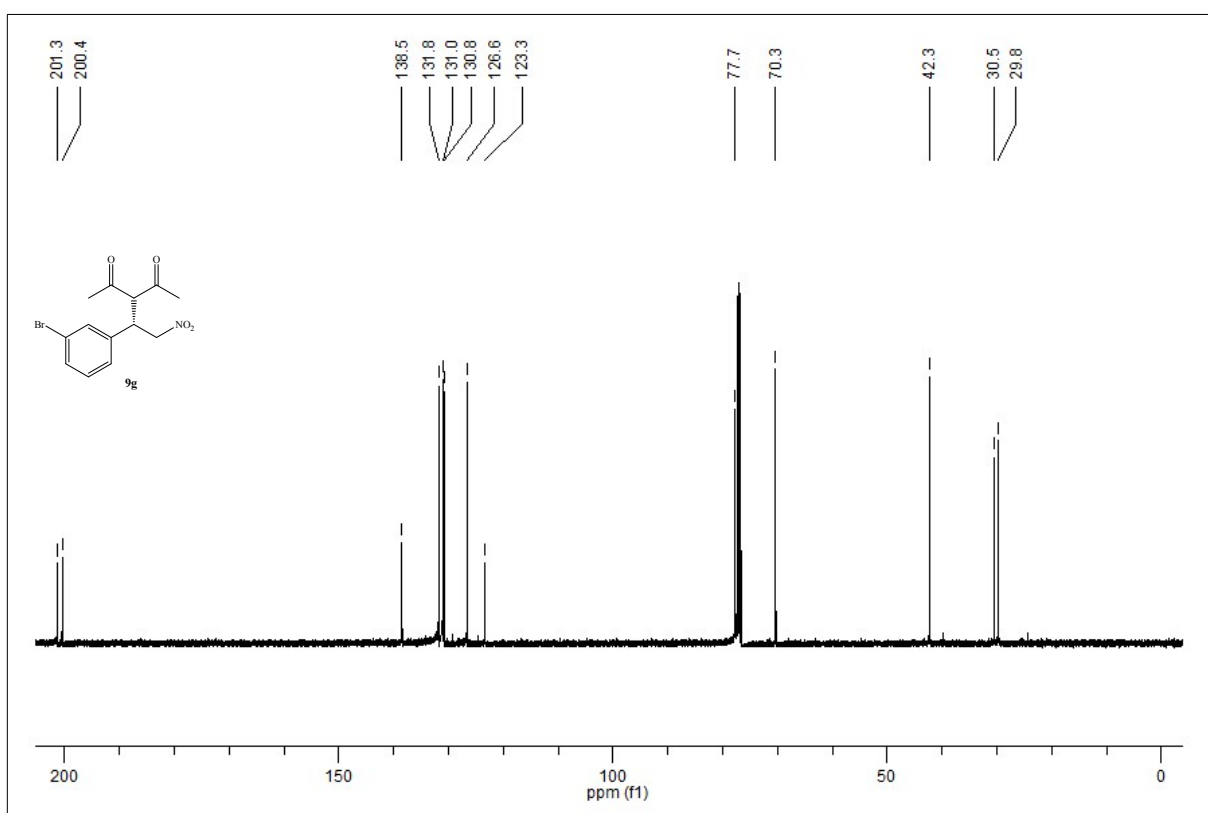

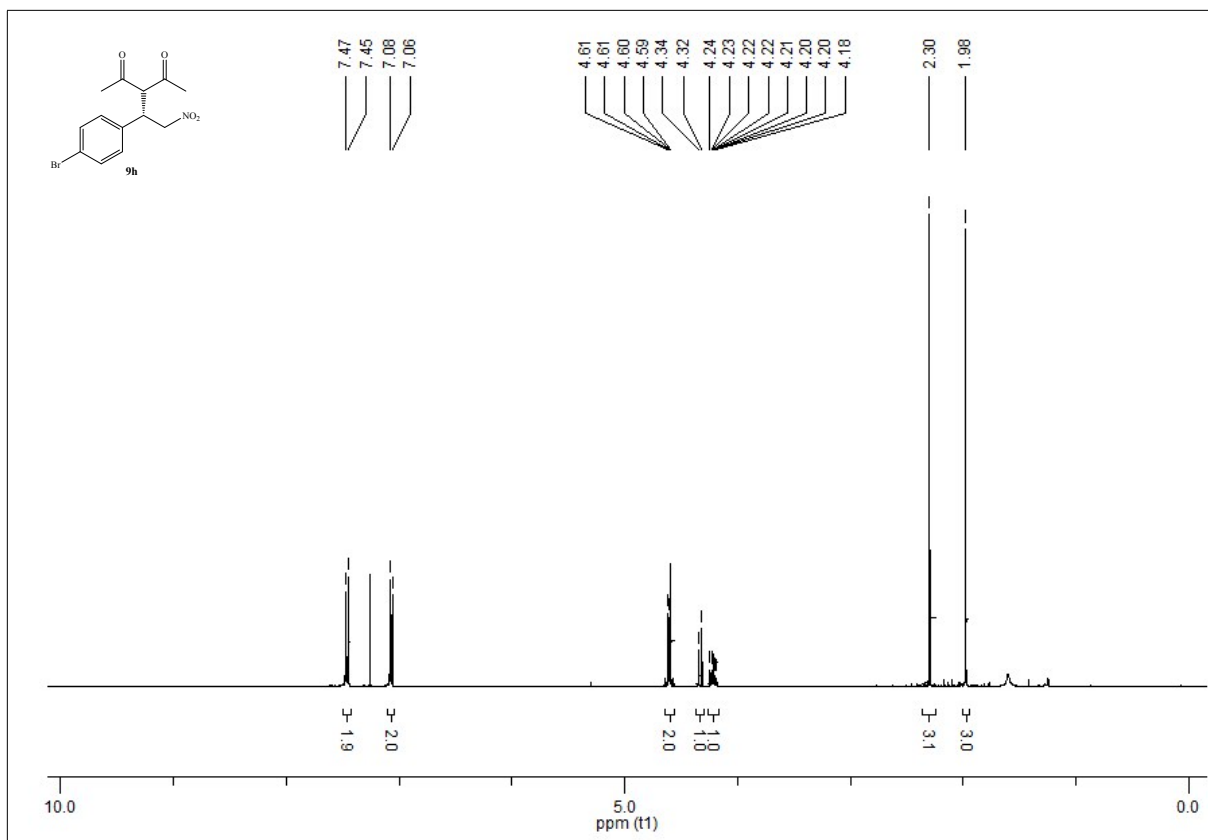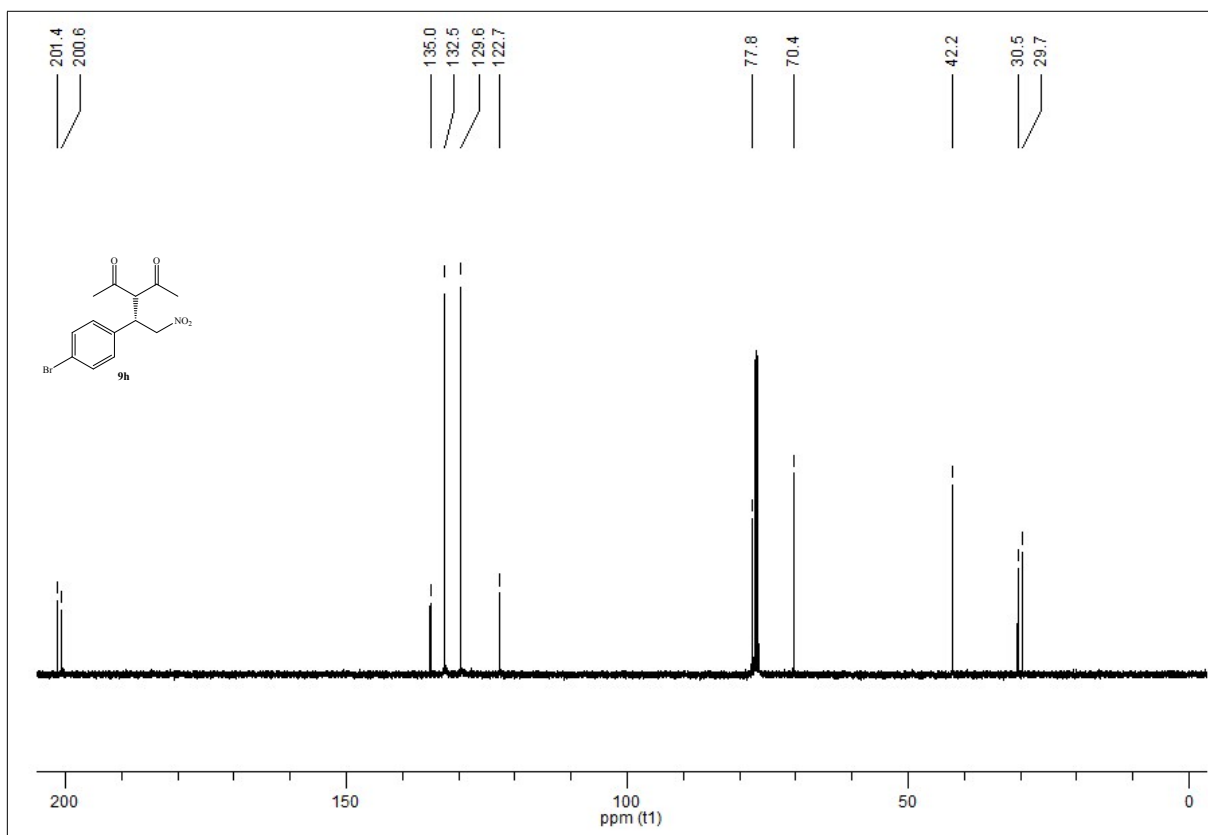

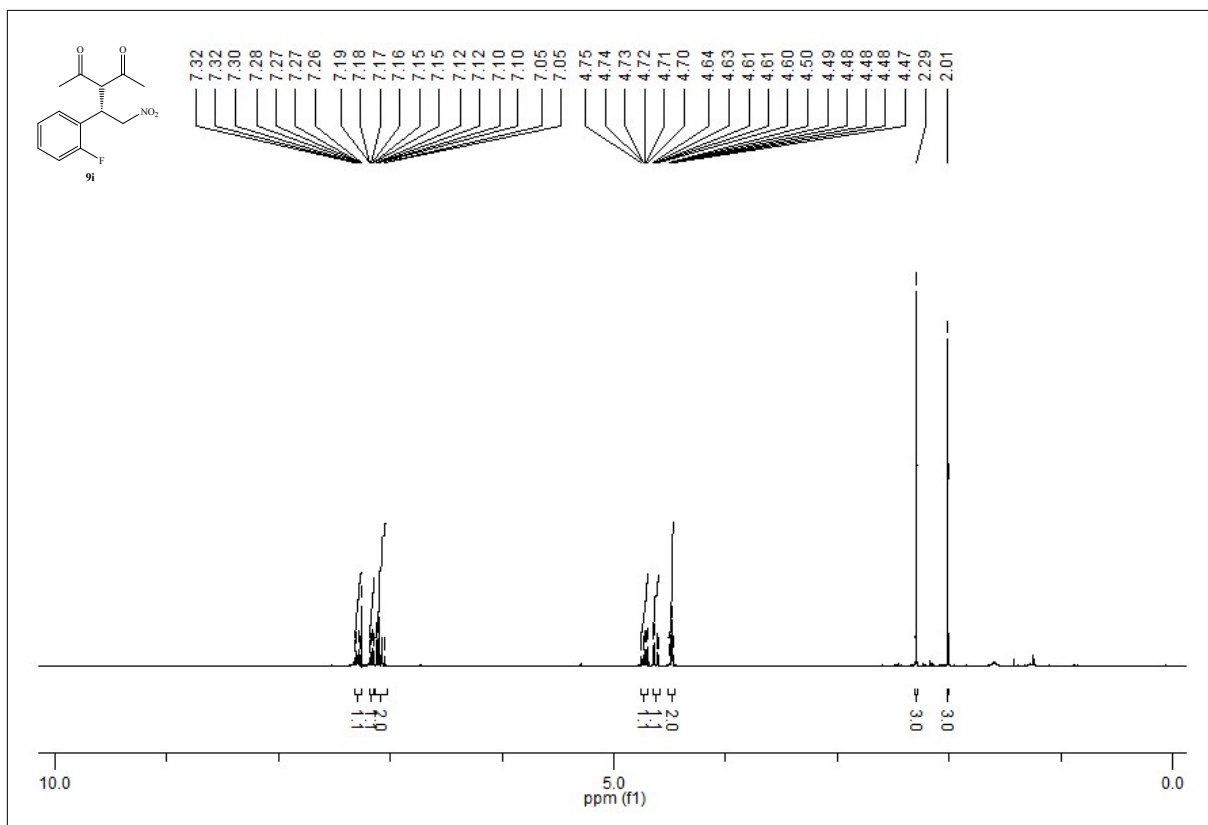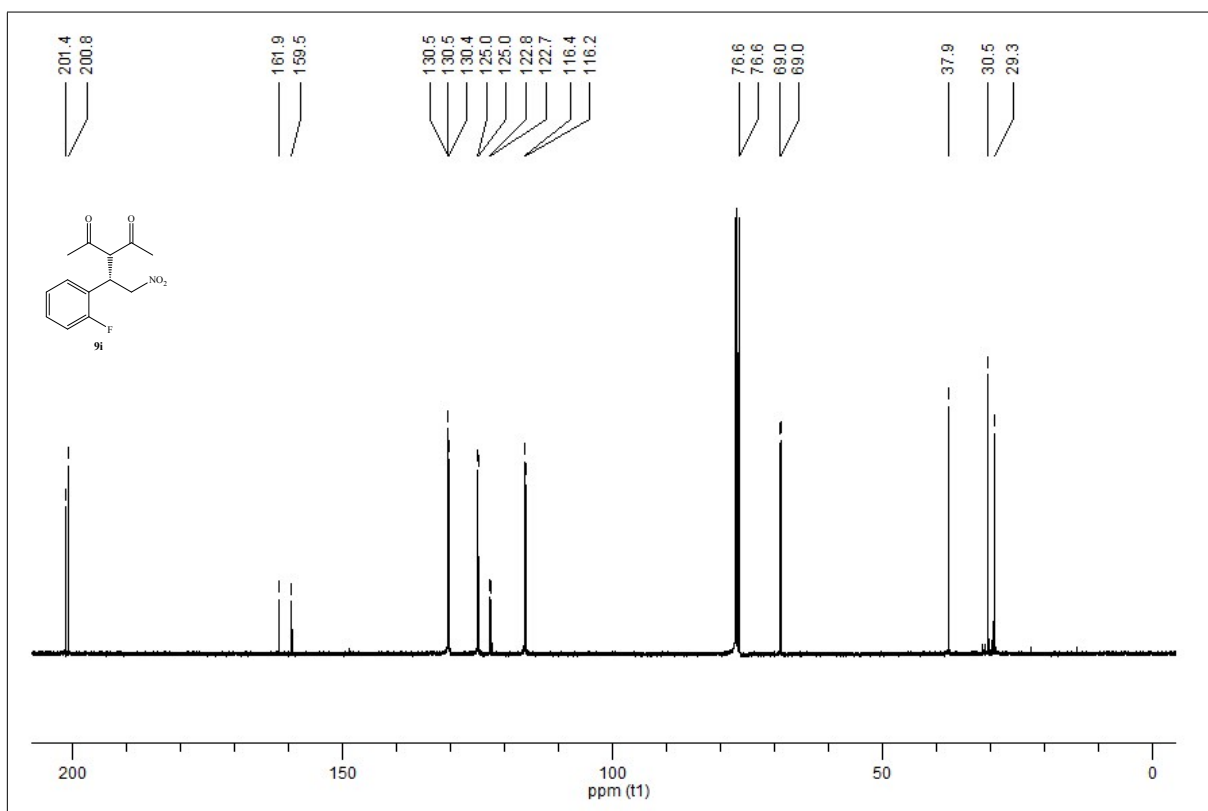

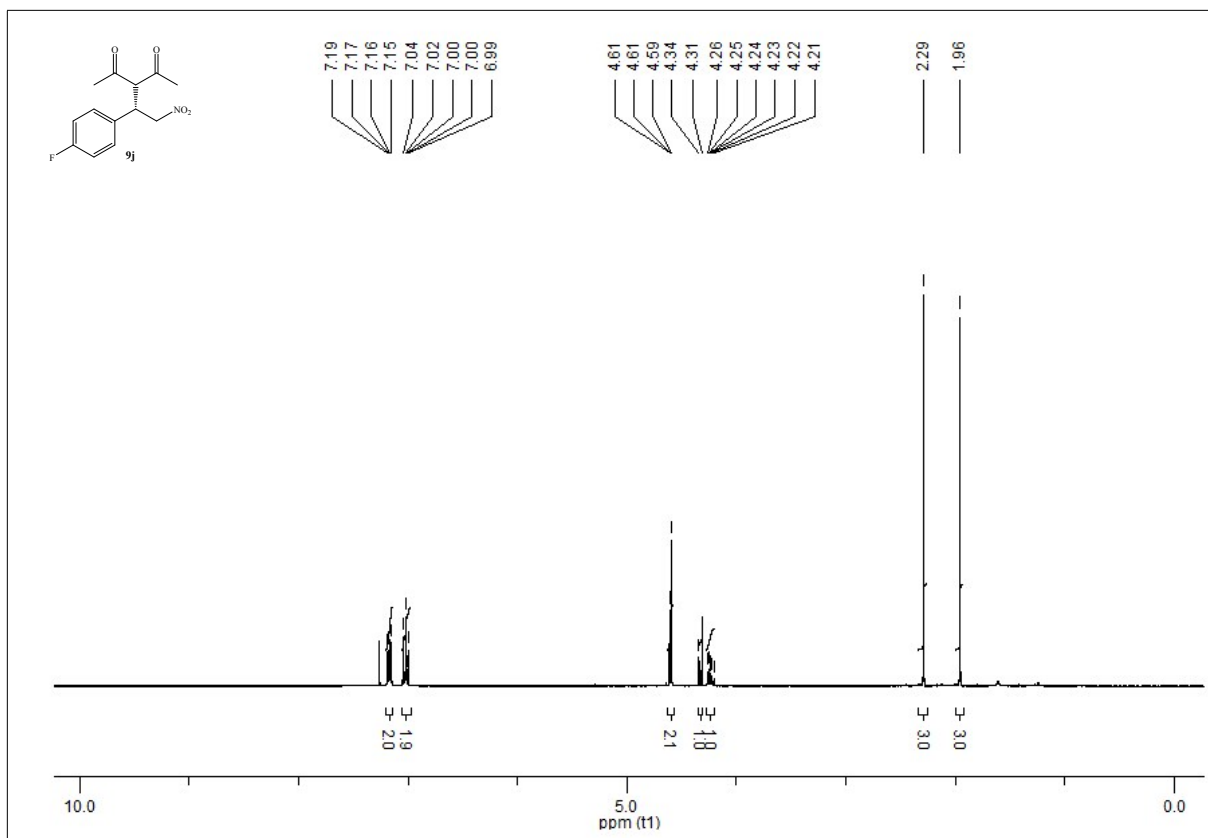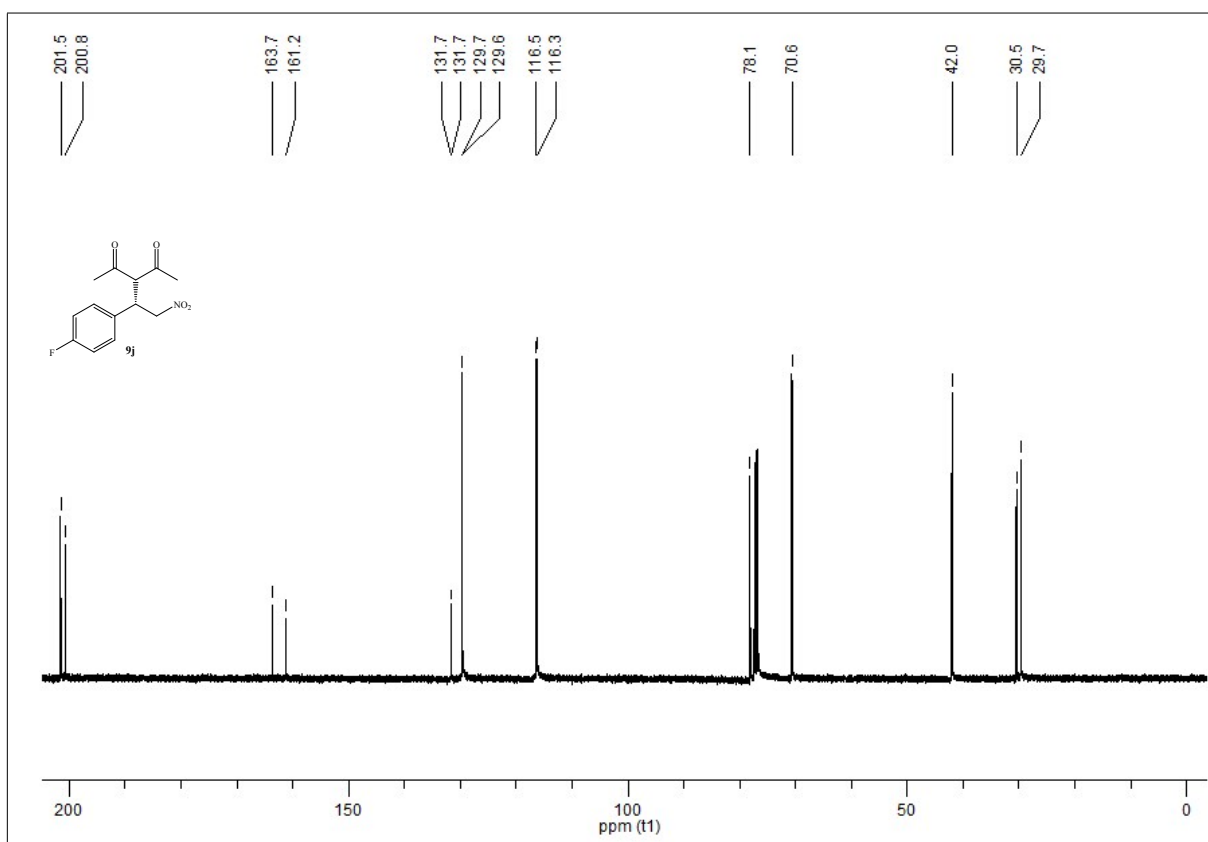

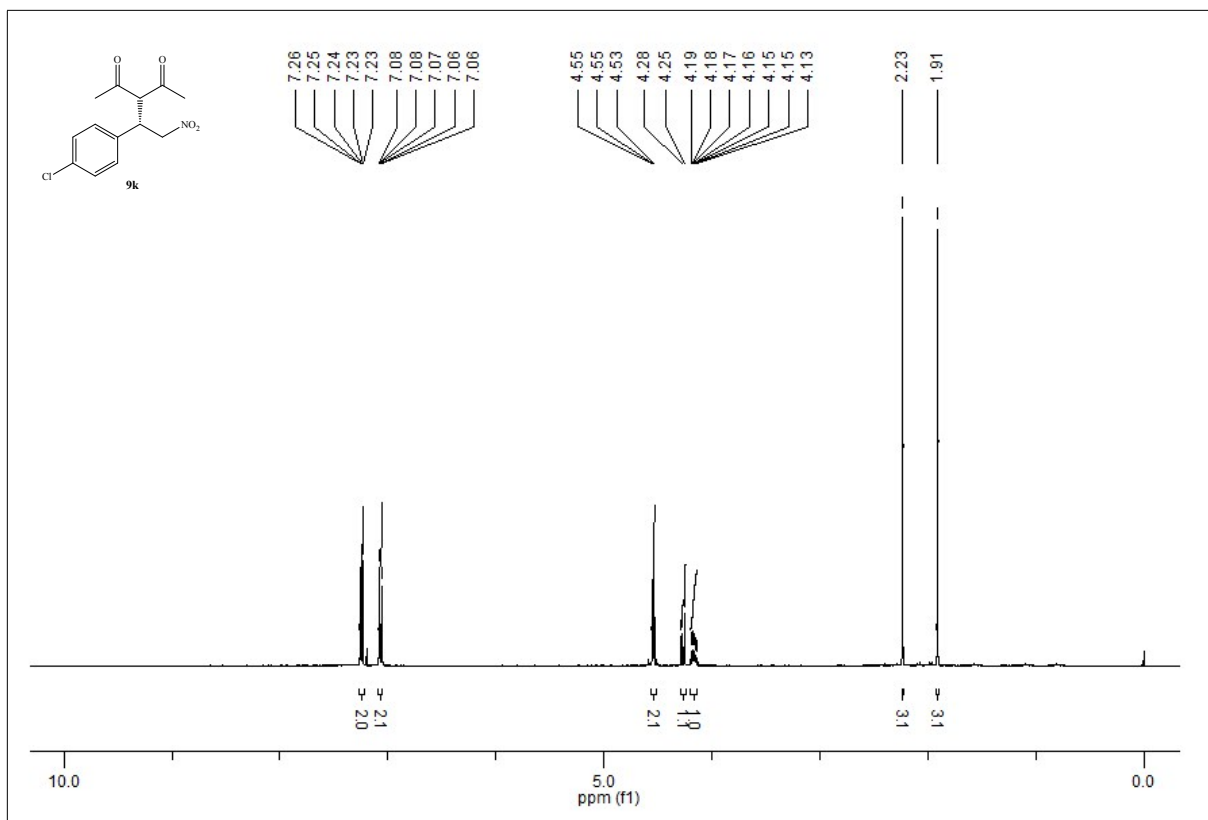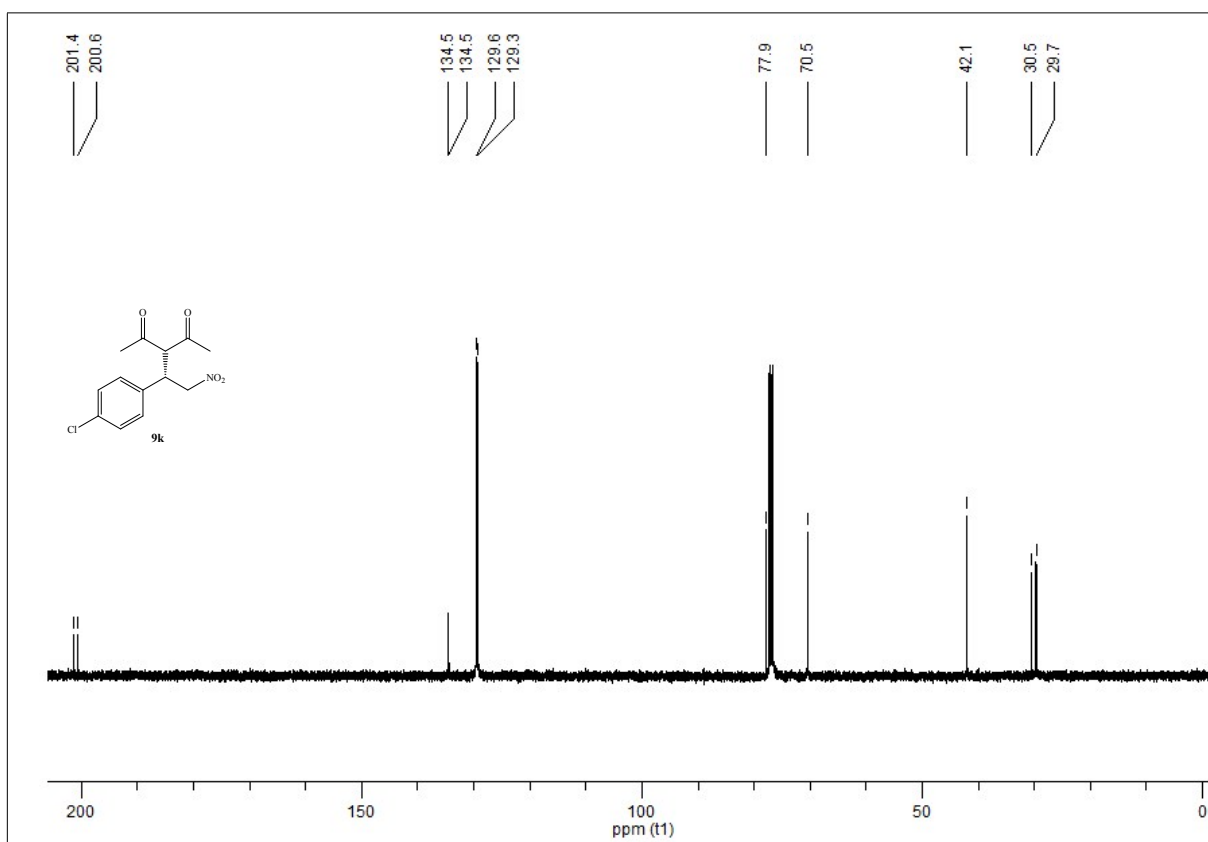





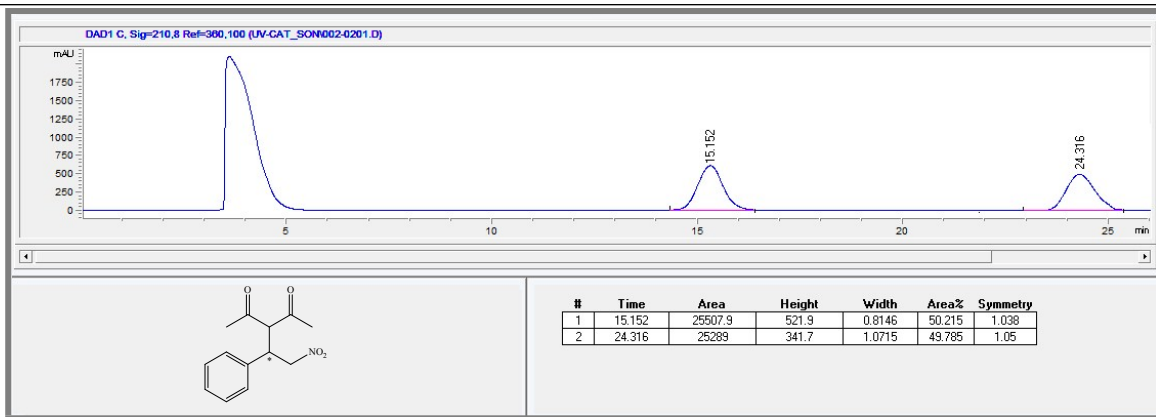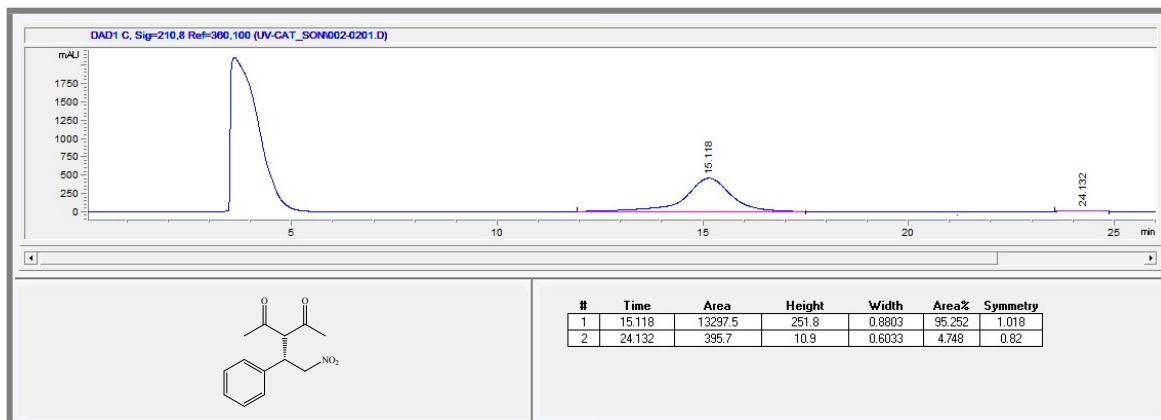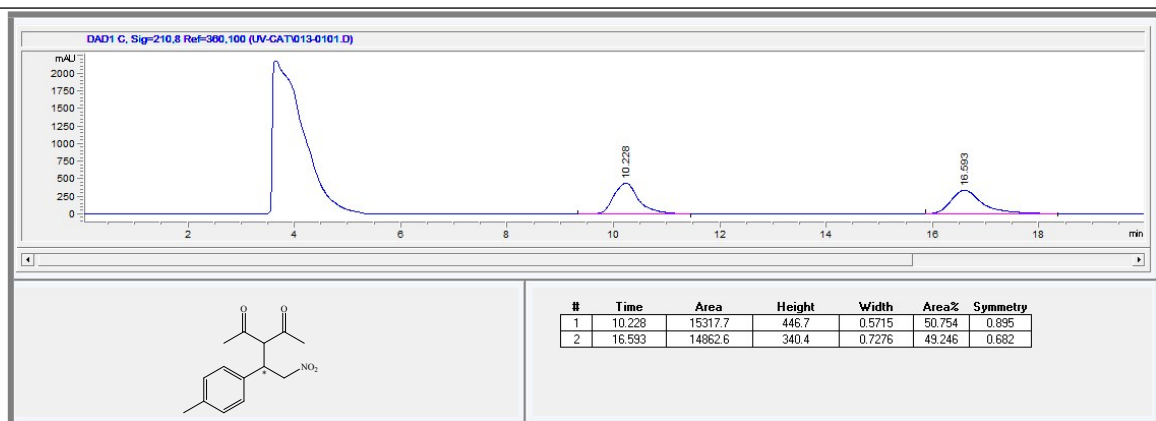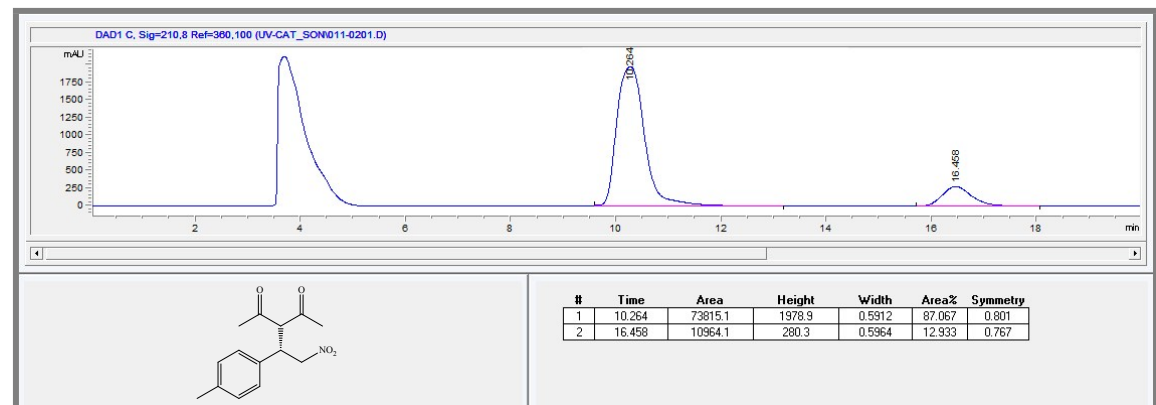

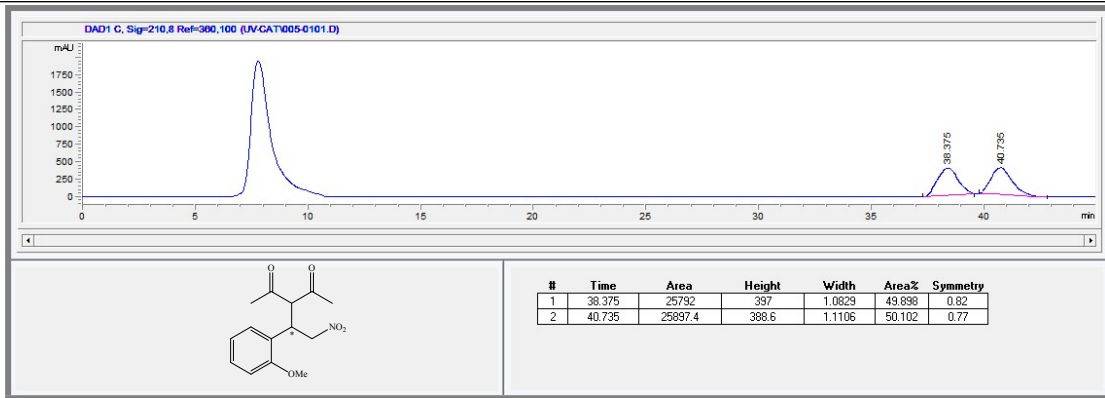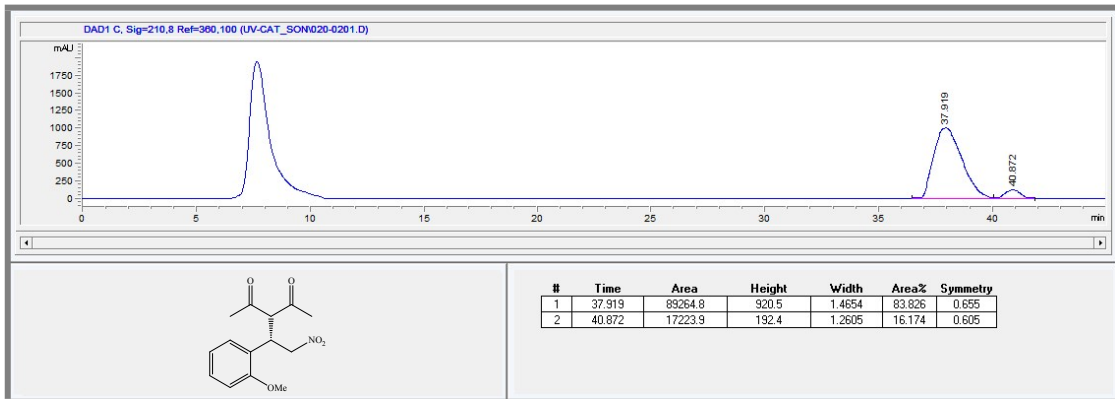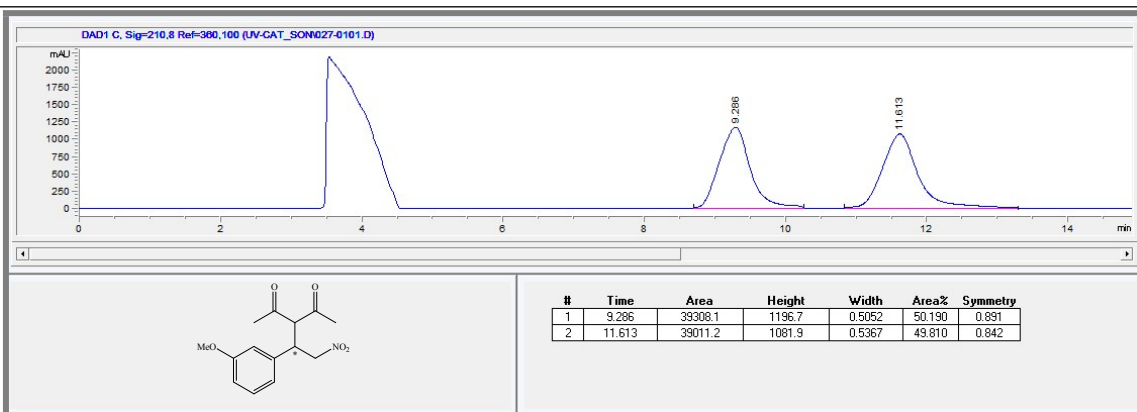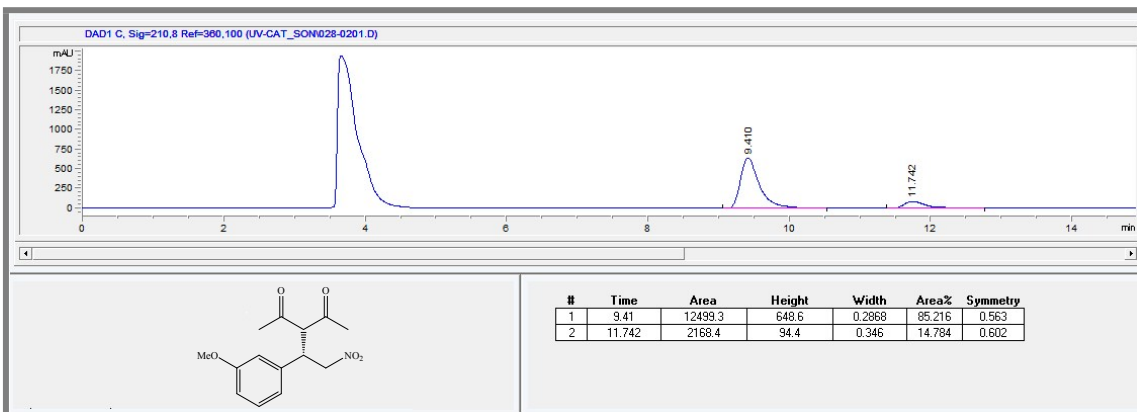

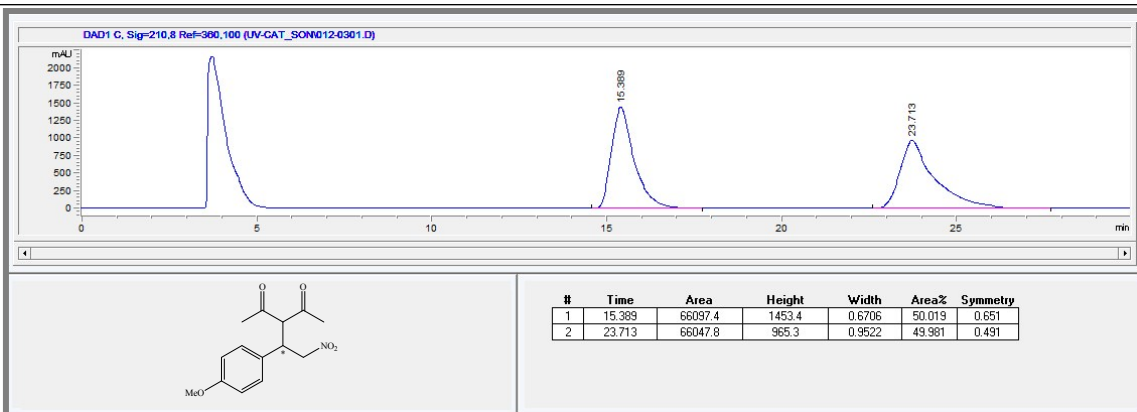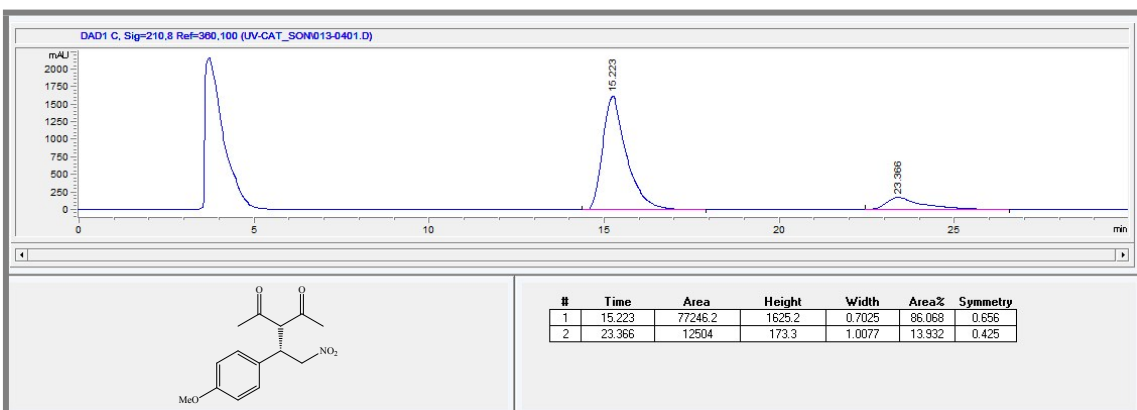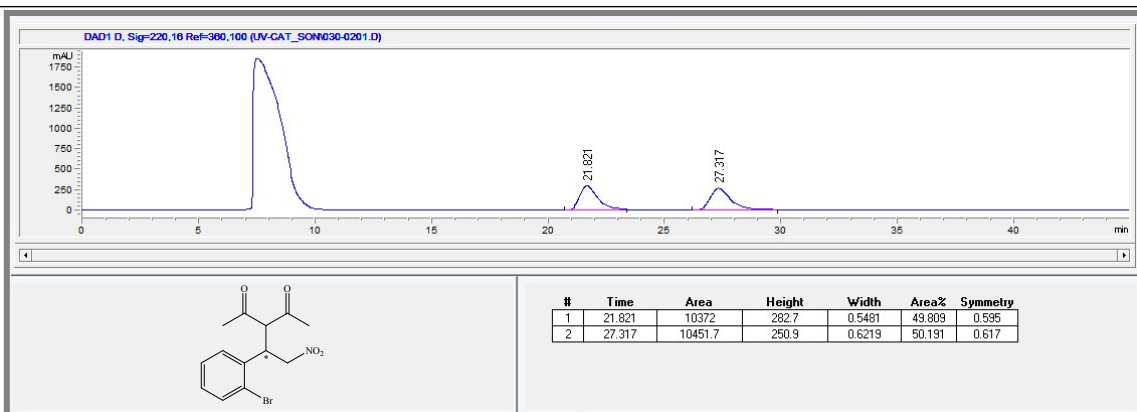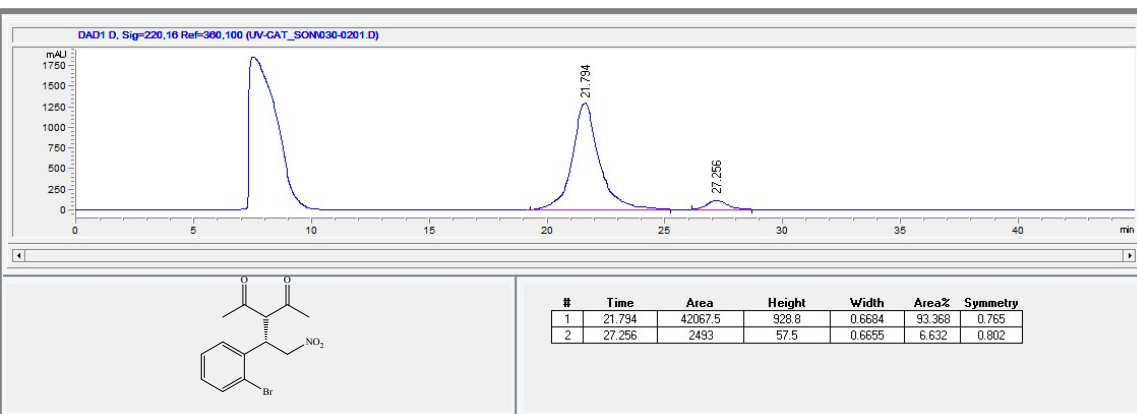

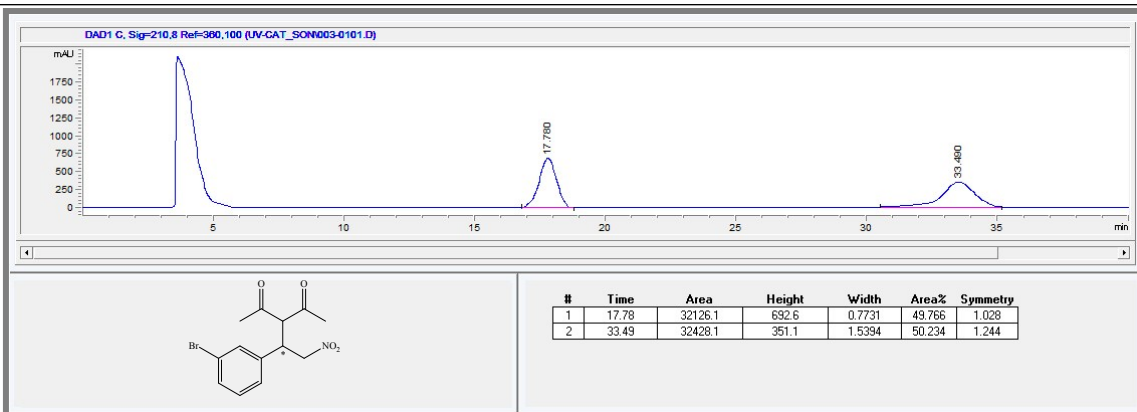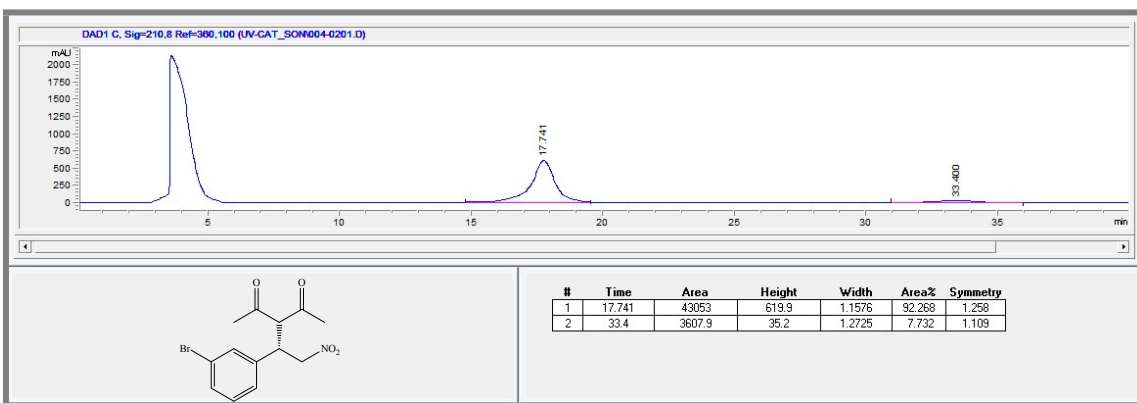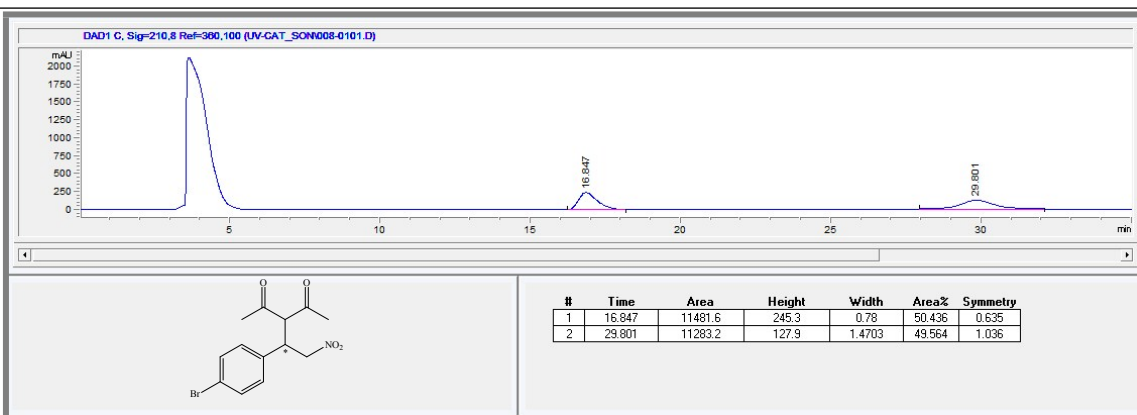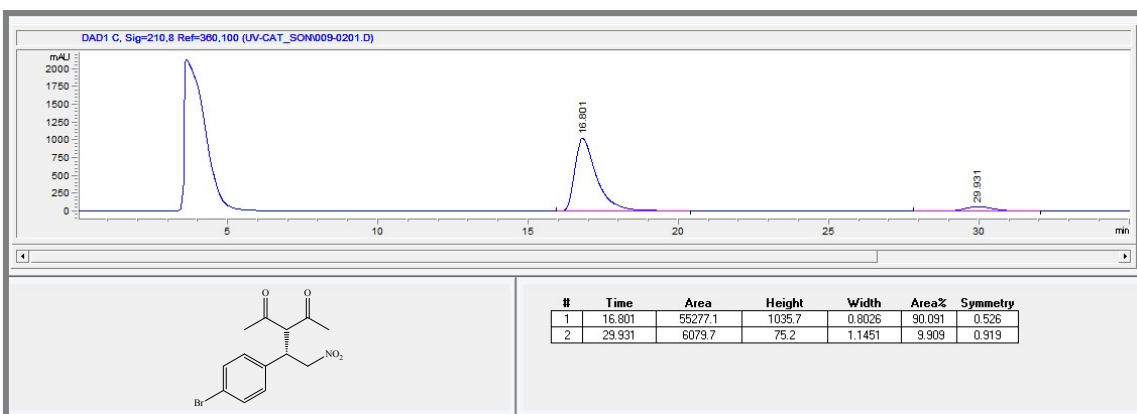

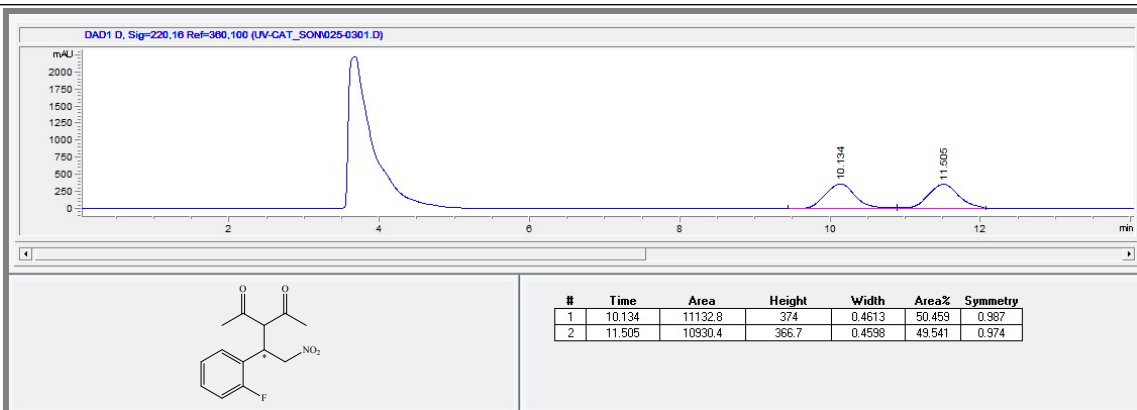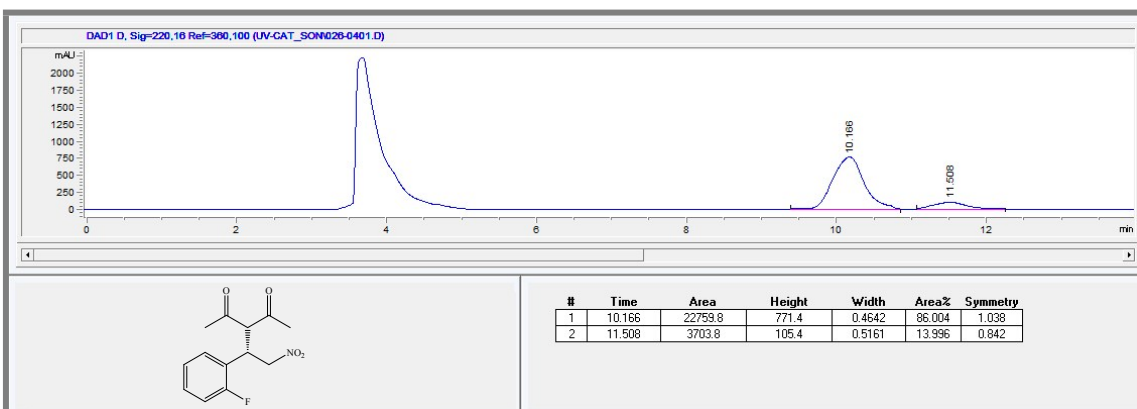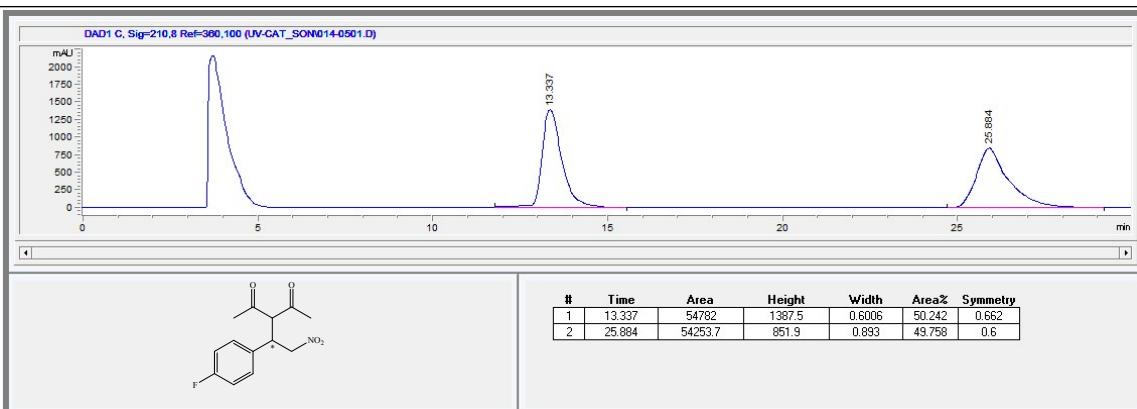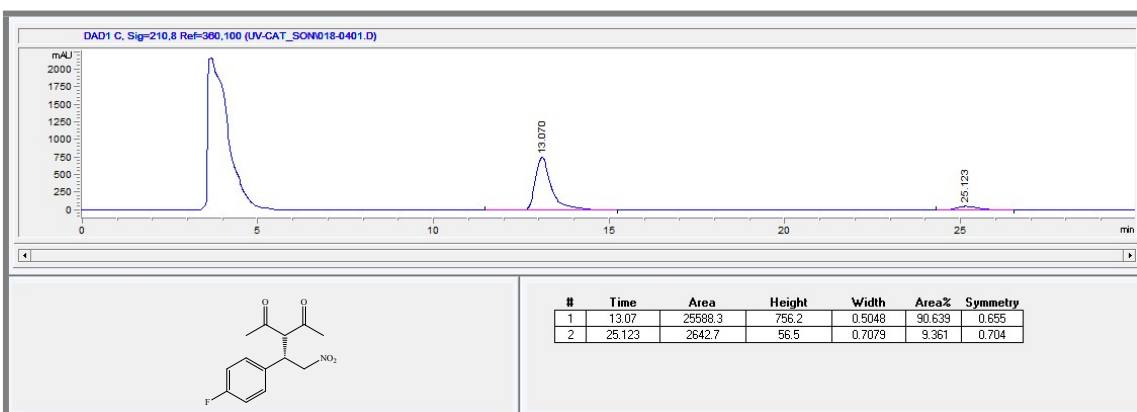

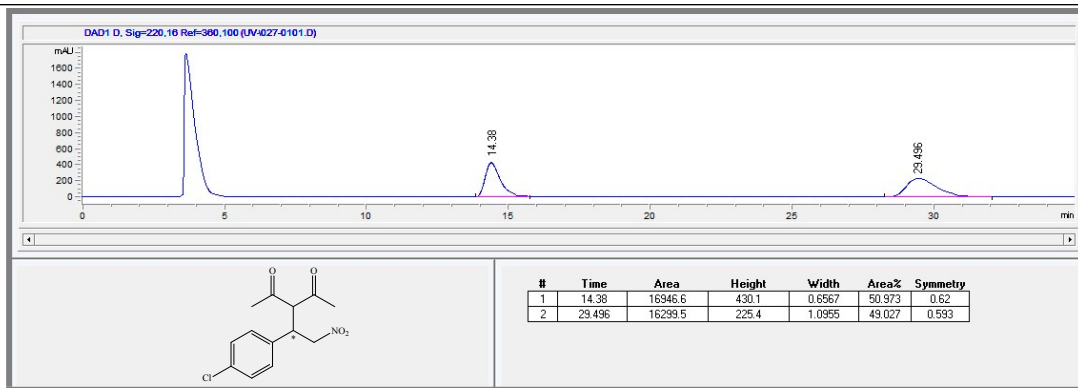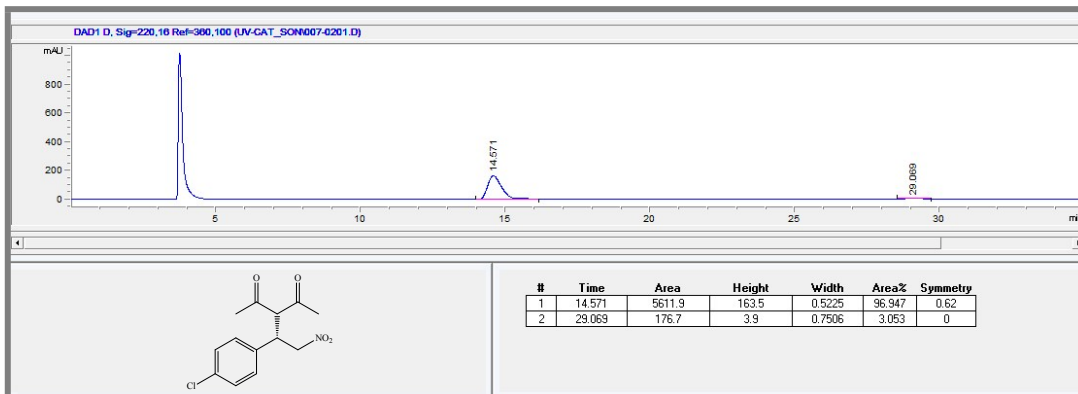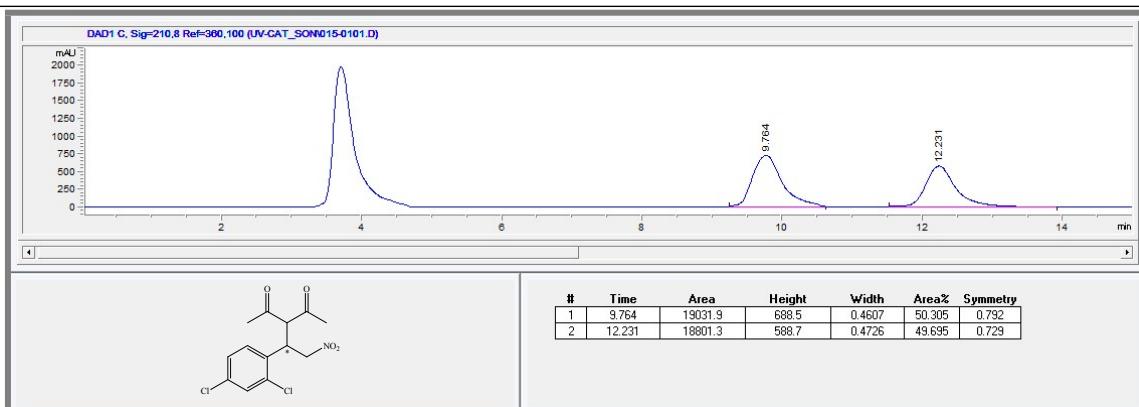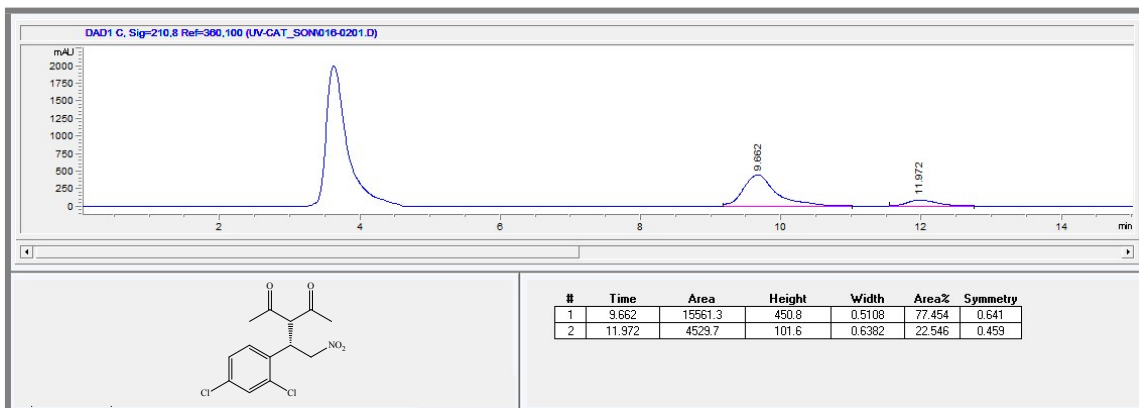

Supplement: c6qo00135a1.pdf [file c6qo00135a1.pdf]
